# Supplementary material for: Impact of obesity, overweight and underweight on life expectancy and lifetime medical expenditures: the Ohsaki Cohort Study
Source: PubMed Central journal article supplement — BMJ Open. 2012 May 11;2(3):e000940. doi: 10.1136/bmjopen-2012-000940 (PMC3353127; doi:10.1136/bmjopen-2012-000940), 2012-05-11

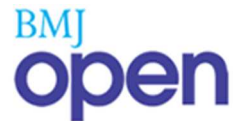

**Impact of Obesity, Overweight and Underweight on Life Expectancy and Lifetime Medical Expenditures: The Ohsaki Cohort Study**

|                                 |                                                                                                                                                                                                                                                                                                                                                                                                                                                                                                                                                                                                                                                                                                                                                                                                                                                                                                                                                                                                                                                                                                                                                                                                                                                                                                |
|---------------------------------|------------------------------------------------------------------------------------------------------------------------------------------------------------------------------------------------------------------------------------------------------------------------------------------------------------------------------------------------------------------------------------------------------------------------------------------------------------------------------------------------------------------------------------------------------------------------------------------------------------------------------------------------------------------------------------------------------------------------------------------------------------------------------------------------------------------------------------------------------------------------------------------------------------------------------------------------------------------------------------------------------------------------------------------------------------------------------------------------------------------------------------------------------------------------------------------------------------------------------------------------------------------------------------------------|
| Journal:                        | <i>BMJ Open</i>                                                                                                                                                                                                                                                                                                                                                                                                                                                                                                                                                                                                                                                                                                                                                                                                                                                                                                                                                                                                                                                                                                                                                                                                                                                                                |
| Manuscript ID:                  | bmjopen-2012-000940                                                                                                                                                                                                                                                                                                                                                                                                                                                                                                                                                                                                                                                                                                                                                                                                                                                                                                                                                                                                                                                                                                                                                                                                                                                                            |
| Article Type:                   | Research                                                                                                                                                                                                                                                                                                                                                                                                                                                                                                                                                                                                                                                                                                                                                                                                                                                                                                                                                                                                                                                                                                                                                                                                                                                                                       |
| Date Submitted by the Author:   | 25-Jan-2012                                                                                                                                                                                                                                                                                                                                                                                                                                                                                                                                                                                                                                                                                                                                                                                                                                                                                                                                                                                                                                                                                                                                                                                                                                                                                    |
| Complete List of Authors:       | Nagai, Masato; Tohoku University Graduate School of Medicine, Division of Epidemiology, Department of Public Health and Forensic Medicine<br>Kuriyama, Shinichi; Tohoku University Graduate School of Medicine, Department of Molecular Epidemiology, Environment and Genome Research Center; Tohoku University Graduate School of Medicine, Division of Epidemiology, Department of Public Health and Forensic Medicine<br>Kakizaki, Masako; Tohoku University Graduate School of Medicine, Division of Epidemiology, Department of Public Health and Forensic Medicine<br>Ohmori-Matsuda, Kaori; Tohoku University Graduate School of Medicine, Division of Epidemiology, Department of Public Health and Forensic Medicine<br>Sone, Toshimasa; Tohoku University Graduate School of Medicine, Division of Epidemiology, Department of Public Health and Forensic Medicine<br>Hozawa, Atsushi; Yamagata University Graduate School of Medical Science, Department of Public Health; Tohoku University Graduate School of Medicine, Division of Epidemiology, Department of Public Health and Forensic Medicine<br>Kawado, Miyuki; Fujita Health University School of Medicine, Department of Hygiene<br>Hashimoto, Shuji; Fujita Health University School of Medicine, Department of Hygiene |
| <b>Primary Subject Heading</b>: | Epidemiology                                                                                                                                                                                                                                                                                                                                                                                                                                                                                                                                                                                                                                                                                                                                                                                                                                                                                                                                                                                                                                                                                                                                                                                                                                                                                   |
| Secondary Subject Heading:      | Health economics, Public health                                                                                                                                                                                                                                                                                                                                                                                                                                                                                                                                                                                                                                                                                                                                                                                                                                                                                                                                                                                                                                                                                                                                                                                                                                                                |
| Keywords:                       | Body mass index, Life expectancy, Lifetime medical expenditure, Longevity, Obesity                                                                                                                                                                                                                                                                                                                                                                                                                                                                                                                                                                                                                                                                                                                                                                                                                                                                                                                                                                                                                                                                                                                                                                                                             |
|                                 |                                                                                                                                                                                                                                                                                                                                                                                                                                                                                                                                                                                                                                                                                                                                                                                                                                                                                                                                                                                                                                                                                                                                                                                                                                                                                                |

SCHOLARONE™  
Manuscripts

**Research****Impact of Obesity, Overweight and Underweight on Life Expectancy and Lifetime****Medical Expenditures: The Ohsaki Cohort Study**

Running Title: BMI, Life Expectancy, and Lifetime Medical Cost

Masato Nagai, PhD<sup>1</sup>, Shinichi Kuriyama, MD, PhD<sup>1,2</sup>, Masako Kakizaki, PhD<sup>1</sup>, Kaori Ohmori-Matsuda, MD, PhD<sup>1</sup>, Toshimasa Sone, MSc<sup>1</sup>, Atsushi Hozawa, MD, PhD<sup>1,3</sup>, Miyuki Kawado, PhD<sup>4</sup>, Shuji Hashimoto, PhD<sup>4</sup>, and Ichiro Tsuji, MD, PhD<sup>1</sup>

<sup>1</sup> Division of Epidemiology, Department of Public Health and Forensic Medicine, Tohoku University Graduate School of Medicine, Sendai, Japan

<sup>2</sup> Department of Molecular Epidemiology, Environment and Genome Research Center, Tohoku University Graduate School of Medicine, Sendai, Japan

<sup>3</sup> Department of Public Health, Yamagata University Graduate School of Medical Science, Yamagata, Japan

<sup>4</sup> Department of Hygiene, Fujita Health University School of Medicine, Toyoake, Japan

**Address for correspondence:**

Masato Nagai, PhD.

1  
2  
3  
4  
5  
6 Division of Epidemiology, Department of Public Health and Forensic Medicine, Tohoku  
7

8 University Graduate School of Medicine, Sendai, Japan  
9

10 2-1 Seiryomachi, Aoba-ku, Sendai, Miyagi, 980-8575, Japan  
11

12  
13  
14 Phone: +81-22-717-8123  
15

16 Fax: +81-22-717-8125  
17

18  
19 E-mail: [m-nagai@med.tohoku.ac.jp](mailto:m-nagai@med.tohoku.ac.jp)  
20  
21  
22  
23

24 Manuscript information:  
25

26  
27 #Financial support: This study was supported by a Health Sciences Research Grant for  
28

29 Health Services (H21-Choju-Ippan-001, H20-Junkankitou (Seisyu)-Ippan-013, H22-  
30

31 Junkankitou (Seisyu)-Ippan-012), Ministry of Health, Labour and Welfare, Japan.  
32

33  
34 Masato Nagai is a recipient of a Research Fellowships of the Japan Society for the  
35

36 Promotion of Science for Young Scientists.  
37  
38  
39  
40  
41  
42

43 #Word counts: 2,985  
44

45 #References: 34  
46  
47

48 #Tables: 3  
49

50 #Figures: 2  
51  
52

53 #Page: 3  
54  
55  
56  
57  
58  
59  
60

**Abstract****Objective**

People who are obese have higher demands for medical care than those of normal weight. However, in view of their shorter life expectancy, it is unclear whether obese people have higher lifetime medical expenditure. We examined the association between body mass index (BMI), life expectancy, and lifetime medical expenditure.

**Method**

We followed up 41,965 participants aged 40-79 years and prospectively collected data on their medical expenditure and survival covering a 13-year period. Participants were classified the following BMI categories: <18.5, 18.5-24.9 (normal weight), 25.0-29.9 (overweight),  $\geq 30.0$  kg/m<sup>2</sup> (obesity). We constructed life tables, and estimated the life expectancy and lifetime medical expenditure from 40 years of age using estimate of multiadjusted mortality and medical expenditure by Poisson regression model and linear regression model, respectively.

**Results**

In spite of their shorter life expectancy, obese participants required higher medical expenditure than normal weight participants. In men aged 40 years, multiadjusted life expectancy for those who were obese participants was 41.4 years, which was 1.7 years shorter than that for normal weight participants ( $p=0.3184$ ). Multiadjusted lifetime medical expenditure for obese participants was £112,858.9, being 14.7% higher than

1  
2  
3  
4  
5  
6 that for normal weight participants ( $p=0.1141$ ). In women aged 40 years,  
7  
8  
9 multiadjusted life expectancy for those who were obese participants was 49.2 years,  
10  
11 which was 3.1 years shorter than for normal weight participants ( $p=0.0724$ ), and  
12  
13 multiadjusted lifetime medical expenditure was £137,765.9, being 21.6% higher  
14  
15  
16 ( $p=0.0005$ ).  
17

### 18 19 **Discussion**

20  
21 Lifetime medical expenditure appears to be higher for obese participants, despite their  
22  
23 short life expectancy. With weight control, more people would enjoy their longevity  
24  
25  
26 with lower demands for medical care.  
27  
28

29  
30 (260 words)  
31  
32  
33  
34

35 **Key Words:** Body mass index; Life expectancy; Lifetime medical expenditure;

36  
37 Longevity; Obesity;  
38  
39  
40  
41  
42  
43  
44  
45  
46  
47  
48  
49  
50  
51  
52  
53  
54  
55  
56  
57  
58  
59  
60

## Introduction

Obesity is closely associated with an increased risk of cardiovascular disease (CVD), cancer, hypertension, diabetes mellitus, and other medical problems. Previous studies have reported that obese and overweight people have higher needs and demands for medical care than normal weight people.<sup>1-5</sup> However, it is unclear whether obese people have higher lifetime medical expenditure than those of normal weight, because the former have a comparatively shorter life expectancy.<sup>6-10</sup> Additionally, underweight people have a higher risk of mortality, and thus also tend to have higher medical expenditure per month or per person, based on a 10-year follow-up.<sup>14</sup>

Although four previous studies have examined the association between obesity and lifetime medical expenditure,<sup>10-13</sup> the results were inconsistent. One study showed that obese people had lower lifetime medical expenditure than those of normal weight,<sup>11</sup> whereas the others indicated that obese people had higher lifetime medical expenditure.<sup>10 12 13</sup> In addition, two of the four studies estimated lifetime medical expenditure from excess risk of cause-specific mortality and mean medical expenditure for the index disease.<sup>10 11</sup> Only the other two studies calculated lifetime medical expenditure on the basis of individual medical expenditure and mortality.<sup>12 13</sup> However, one of those studies followed up the participants for only 2 years,<sup>12</sup> and the

1  
2  
3  
4  
5  
6 other calculated lifetime medical expenditure for elderly participants aged 70 years or  
7  
8 over.<sup>13</sup> Therefore, the association between body mass index (BMI) and lifetime  
9  
10 medical expenditure remains to be fully clarified.  
11  
12

13  
14 We therefore conducted a 13-year prospective observation of 41,965 Japanese  
15  
16 adults aged 40-79 years living in the community, which accrued 392,860 person-years.  
17  
18 We examined the association between BMI and lifetime medical expenditure, based on  
19  
20 individual medical expenditure and life table analysis.<sup>14-17</sup> For all participants, this  
21  
22 cohort study collected data for survival and all medical-care utilization and costs,  
23  
24 excluding home care services provided home health aides, nursing home care, and  
25  
26 preventive health services.  
27  
28  
29  
30  
31  
32  
33  
34  
35  
36  
37  
38  
39  
40  
41  
42  
43  
44  
45  
46  
47  
48  
49  
50  
51  
52  
53  
54  
55  
56  
57  
58  
59  
60

## Materials and methods

### Study cohort

We used data from the Ohsaki National Health Insurance (NHI) Cohort Study.<sup>1 14 16-18</sup>

In brief, we sent a self-administered questionnaire on various lifestyle habits between October and December 1994 to all NHI beneficiaries living in the catchment area of Ohsaki Public Health Center, Miyagi Prefecture, northeastern Japan. A survey was conducted of NHI beneficiaries aged 40 to 79 years. Among 54,996 eligible individuals, 52,029 (95%) responded.

We excluded 776 participants who had withdrawn from the NHI before January 1, 1995, when we started the prospective collection of NHI claim files. Thus, 51,253 participants formed the study cohort. The study protocol was approved by the Ethics Committee of Tohoku University School of Medicine. The participants who had returned the self-administered questionnaires and had signed them were considered to have consented to participate in this study.

For the current analysis, we also excluded participants who did not provide information about body weight and height (n=3,543), were at both extremes of the BMI range: lower than the 0.05th percentile for BMI (below 14.41 for men; below 13.67 for women) or higher than the 99.95th percentile for BMI (above 58.46 for men; above 62.00 for women; n=48), those who died within the first year (n=454), or those who had



1  
2  
3  
4  
5  
6 a history of cancer (n=1,533), myocardial infarction (n=1,233), stroke (n=831), or  
7  
8 kidney disease (n=1,646). Thus, a total of 41,965 participants (20,066 men and 21,899  
9  
10 women) participated.  
11  
12

### 13 14 15 16 17 **Body mass index**

18  
19 The self-administered questionnaire included questions on weight and height, and BMI  
20  
21 was calculated as weight divided by the square of height (kg/m<sup>2</sup>). We divided the  
22  
23 participants into groups according to the following BMI categories: <18.5  
24  
25 (underweight), 18.5-24.9 (normal weight), 25.0-29.9 (overweight), and ≥30.0 kg/m<sup>2</sup>  
26  
27 (obesity). These BMI categories correspond to the cut-off points proposed by the  
28  
29 World Health Organization (WHO): normal BMI range (18.5-24.9 kg/m<sup>2</sup>), grade 1  
30  
31 overweight (25.0-29.9 kg/m<sup>2</sup>), grade 2 overweight (30.0-39.9 kg/m<sup>2</sup>), and grade 3  
32  
33 overweight (≥40.0 kg/m<sup>2</sup>).<sup>19</sup>  
34  
35  
36  
37  
38  
39

40 The validity of self-reported body weight and height has been reported earlier<sup>1</sup>.  
41  
42 Briefly, the weight and height of 14,883 participants, who were a subsample of the  
43  
44 cohort, were measured during basic health examinations provided by local governments  
45  
46 in 1995. The Pearson correlation coefficient (r) and weighted kappa (κ) between the  
47  
48 self-reported values and measured values was r=0.96 (p<.01) for weight, r=0.93 (p<.01)  
49  
50 for height, and r=0.88 (p<.01) and κ=0.72 for BMI categories. Thus, the self-reported  
51  
52 heights and weights were considered to be sufficiently valid.  
53  
54  
55  
56  
57  
58  
59  
60

## Health insurance system in Japan

The details of the NHI system have been described previously.<sup>1 4 14 16 18</sup> Briefly, everyone living in Japan is required to enroll in one health insurance system. The NHI covers 35% of the Japanese population for almost all medical treatment, including diagnostic tests, medication, surgery, supplies and materials, physicians and other personnel costs, and most dental treatment. It also covers home care services provided by physicians and nurses but not those by other professionals such as home health aides. The NHI covers inpatient care but not nursing home care. Also, it does not cover preventive health services such as mass screening and health education. Payment to medical providers is made on a fee-for-service basis, where the price of each service is determined by a uniform national fee schedule.

If a participant withdrew from the NHI system because of death, emigration, or employment, the withdrawal date and the reason for withdrawal were coded in the NHI withdrawal history files. We recorded any mortality or migration by reviewing the NHI withdrawal history files and collected data on the death of participants by reviewing the death certificates filed at Ohsaki Public Health Center. We then followed up the participants and prospectively collected data on medical care utilization and its costs for all participants in the cohort from January 1, 1995 through December 31, 2007.

## Statistical analysis

We conducted the same analysis as previous study.<sup>16</sup> Briefly, we divided the age-groups (x) from 40 years according to the following categories: 40-44, 45-49, 50-54, 55-59, 60,64, 65-69, 70-74, 75-79, 80-84, and  $\geq 85$  years. Based on person-years and the number of deaths from 1996 until 2007, the multiadjusted mortality rates for each age category were estimated from a Poisson regression model. The dependent variable was mortality and independent variables were age-groups, categories of BMI, and the following covariates: smoking status (current and past smoker, or never smoker), alcohol consumption (current drinker consuming 1-499 g/week, current drinker consuming  $\geq 450$  g/week, or never and past drinker), sports and physical exercise ( $\geq 3$  hours/week or  $< 3$  hours/week), time spent walking ( $\geq 1$  hours/week or  $< 1$  hours/week), education (junior high school, high school, or college/university or higher). We did not adjust for hypertension and diabetes mellitus in the multivariate models because these variables are considered to occupy an intermediate position in the etiologic pathway between BMI and mortality.

We separately calculated medical expenditure for participants who survived through the index year and for those who died because of increasing medical expenditure before death.<sup>20</sup> The multiadjusted medical expenditure per year was estimated using a linear regression model adjusted for the above covariates in survivors and decedents.

The estimates of multiadjusted mortality and medical expenditure were used for

1  
2  
3  
4  
5  
6 estimating life expectancy and lifetime medical expenditure from 40 years of age. To  
7  
8 estimate life expectancy and lifetime medical expenditure, we constructed life tables  
9  
10 per100,000 persons using Chiang's analytical method on the basis of the latest published  
11  
12 complete life tables of Japan for the year 2000.<sup>21 22</sup> Then, life expectancy ( $e_x$ ) and  
13  
14 lifetime medical expenditure ( $M_x$ ) for each age-groups (x) were estimated using the  
15  
16 numbers of survivors ( $l_x$ ), deaths ( $d_x$ ), static population ( $L_x$ ), multiadjusted medical  
17  
18 expenditure for survivors ( $a_y$ ), and multiadjusted medical expenditure for the deceased  
19  
20 ( $b_y$ ) as follows;

21  
22  
23  
24  
25  
26  
27  $\Sigma$  is sum of  $y \geq x$

$$e_x = \frac{\Sigma L_y}{l_x}$$

$$M_x = \frac{\Sigma(L_y \cdot a_y + d_y \cdot b_y)}{l_x}$$

28  
29  
30  
31  
32  
33  
34  
35 The 95% confidence intervals (CIs) were estimated using a Monte Carlo simulation  
36  
37 based on a Poisson regression model and linear regression model. We repeated  
38  
39 100,000 times and all analysis were used the SAS version 9.1 statistical software  
40  
41 package (SAS Institute Inc., 2004). All  $p$  values were differences at  $p < .05$  were  
42  
43 accepted as statistically significant.  
44  
45  
46  
47

48 We used a purchasing power parity rate of UK£ 1.00=JPN¥ 140.  
49  
50  
51  
52  
53  
54  
55  
56  
57  
58  
59  
60

## Results

After 13 years of follow-up, we observed 5,159 deaths (3,356 men and 1,803 women) among the 41,965 participants (20,066 men and 21,899 women).

The mean medical expenditure per year for survivors in men was £2,392.7 in underweight, £2,055.0 in normal weight, £2,230.7 in overweight, and £2,333.6 in obesity, respectively. In women, it was £2,374.6 in underweight, £1,972.0 in normal weight, £2,316.9 in overweight, and £2,733.0 in obesity, respectively. These differences of mean medical expenditure per year for survivors are statistically significant in men and women ( $p < .0001$ ). Also, the mean medical expenditure in the year of death for participants in men was £15,445.1 in underweight, £16,973.3 in normal weight, £17,810.6 in overweight, and £17,878.3 in obesity, respectively. In women, it was £12,833.1 in underweight, £15,584.2 in normal weight, £17,058.6 in overweight, and £19,635.8 in obesity, respectively. These differences of mean medical expenditure in the year of death for participants are statistically significant in only women (men;  $p = 0.2241$ , women;  $p = 0.0059$ ).

### Baseline characteristics by BMI category

The baseline characteristics of the study participants according to the BMI categories are shown for men and women (Table 1), among whom 3.3% and 3.9% were

1  
2  
3  
4  
5  
6 underweight, 23.6% and 28.4% were overweight, and 2.0% and 3.6% were obese,  
7  
8 respectively.  
9

10  
11 Mean age in men decreased linearly with increasing BMI category. In women,  
12  
13 mean age was highest in the underweight category. The proportions of men and  
14  
15 women who were current and past smokers decreased with increasing BMI, and this  
16  
17 tendency was especially marked in men. The proportions of men who had never and  
18  
19 past drinker were highest in the underweight category. The proportions of men who  
20  
21 did  $\geq 3$  hours sports and physical exercise per week decreased with increasing BMI.  
22  
23 The proportions of men and women who walked  $\geq 1$  hours per day were the lowest in  
24  
25 underweight men and obese women. Educational background increased linearly in  
26  
27 men and decreased linearly in women as the BMI category increased. These  
28  
29 characteristics showed statistically significant difference.  
30  
31  
32  
33  
34  
35  
36  
37  
38  
39

#### 40 **Mortality in terms of categories for BMI**

41  
42  
43 Figure 1-a for men and Figure 1-b for women show the mortality (per 1,000  
44  
45 person-years) in each of the age-groups according to the categories of BMI.  
46  
47

48 In underweight participants, there was a tendency that the mortality was the highest  
49  
50 in each age-group. Overweight participants showed similar mortality with normal  
51  
52 weight participants, especially women. Overweight men showed slightly lower  
53  
54 mortality than normal weight men. In obese participants, the mortality curve was not  
55  
56  
57  
58  
59  
60

described smoothly because of small number of participants.

Table 2 shows the mortality ratio with 95% CIs according to the categories of BMI. In underweight participants, the multiadjusted mortality ratio was significantly higher than that in normal weight participants (men; 1.62, 95% CIs; 1.41-1.86,  $p < .0001$ , women; 1.46, 1.22-1.76,  $p < .0001$ ). In overweight participants, the multiadjusted mortality ratio was significantly lower in men and non-significantly lower in women than that in normal weight participants (men; 0.91, 0.83-0.99,  $p = 0.0260$ , women; 0.98, 0.88-1.10,  $p = 0.7841$ ). In obese participants, the multiadjusted mortality ratio was non-significantly higher than that in normal weight participants (men; 1.14, 0.88-1.49,  $p = 0.3177$ , women; 1.23, 0.98-1.55,  $p = 0.0717$ ).

### **Life expectancy and lifetime medical expenditure by BMI category**

Table 3 show life expectancy and lifetime medical expenditure with 95% CIs according to the BMI categories.

By multiadjusted analysis, obese men and women had approximately 1.7 years and 3.1 years shorter life expectancy from the age of 40 years in comparison with men and women of normal weight, respectively. Meanwhile, obese men and women had approximately 14.7% and 21.6% higher lifetime medical expenditure in comparison with normal weight participants, respectively.

In men, multiadjusted life expectancy was greatest for overweight, i.e. 44.34 years

1  
2  
3  
4  
5  
6 (95% CI; 43.11-45.54,  $p=0.0264$ ), followed by normal weight (43.03 years,  
7  
8 42.22-43.73), and obesity (41.36 years, 38.28-44.70,  $p=0.3184$ ), and was shortest for  
9  
10 underweight (37.40 years, 35.80-38.87,  $p<.0001$ ). The multiadjusted lifetime medical  
11  
12 expenditure for overweight was the highest, i.e. £114,766.9 (95% CI;  
13  
14 107,754.1-121,966.6,  $p<.0001$ ), followed by obesity (£112,858.9, 94,954.1-131,840.9,  
15  
16  $p=0.1141$ ) and normal weight (£98,355.0, 93,615.3-103,010.2), and was the lowest for  
17  
18 underweight (£93,208.7, 81,704.9-104,706.4,  $p=0.3916$ ).  
19  
20  
21  
22  
23

24 In women, multiadjusted life expectancy was greatest for overweight, i.e. 52.56  
25  
26 years (50.67-54.46,  $p=0.7797$ ), followed by normal weight (52.31 years, 50.79-53.75),  
27  
28 and obesity (49.23 years, 46.14-52.59,  $p=0.0724$ ), and was shortest for underweight  
29  
30 (46.98 years, 44.63-49.29,  $p<.0001$ ). The lifetime medical expenditure for obesity was  
31  
32 the highest (£137,765.9, 123,672.9-152,970.2,  $p=0.0005$ ), followed by overweight  
33  
34 (£129,964.6, 121,845.4-138,577.2,  $p<.0001$ ), and normal weight (£113,282.9,  
35  
36 106,668.0-120,054.6), and was lowest for underweight (£109,382.2, 97,996.6-121,008.6,  
37  
38  $p=0.5174$ ).  
39  
40  
41  
42  
43  
44  
45  
46  
47  
48  
49  
50  
51  
52  
53  
54  
55  
56  
57  
58  
59  
60



## Discussion

The present results indicate that: 1) obese men and women have 14.7% and 21.6% higher multiadjusted lifetime medical expenditure than those of normal weight, even though their life expectancy is shorter by 1.7 years and 3.1 years than those of normal weight participants, respectively; 2) underweight men and women have 5.2% and 3.4% lower lifetime medical expenditure than those of normal weight because men and women live 5.6 years and 5.3 years less than those of normal weight, respectively.

## Comparison with other studies

Obese participants had shorter life expectancy than normal weight participants, as has been observed in previous studies.<sup>6-10</sup> Overweight participants had longer life expectancy than normal weight participants. Two of four previous studies have reported that overweight participants had longer life expectancy than normal weight participants.<sup>7,9</sup> These results support our finding of an association between being overweight and life expectancy. Additionally, an association between BMI and all-cause mortality in the Japanese population has been reported by other data sets.<sup>23-29</sup> All seven previous studies showed that among the BMI categories, the lowest one had the highest mortality risk. These results are consistent with the fact that underweight participants have significantly the shortest life expectancy, as was observed in our study.

1  
2  
3  
4  
5  
6 Our present results support three of four previous studies of lifetime medical  
7  
8 expenditure for obese participants.<sup>10 12 13</sup> In comparison to previous studies, we  
9  
10 calculated lifetime medical expenditure from individual medical expenditure and  
11  
12 survival data covering longest follow-up period to date. Meanwhile, one study has  
13  
14 shown that obese participants have lower lifetime medical expenditure than normal  
15  
16 weight participants.<sup>11</sup> However, that study limited the participants to non-smokers,  
17  
18 and calculated lifetime medical expenditure from the mortality of a hypothetical cohort  
19  
20 and estimated medical expenditure from other cohort. In the present study, overweight  
21  
22 participants were found to have higher lifetime medical expenditure than normal weight  
23  
24 participants, as had been reported previously.<sup>10 12 13</sup> We consider that this was  
25  
26 attributable to the higher medical expenditure per month or per person from the 10-year  
27  
28 or 9-year follow-up than for normal weight participants.<sup>1 3 4</sup> On the other hand, with  
29  
30 regard to underweight participants, our present findings were inconsistent with those of  
31  
32 a previous study that examined the association between being underweight and lifetime  
33  
34 medical expenditure.<sup>13</sup> However, that study calculated lifetime medical expenditure  
35  
36 for elderly participants aged over 70 years. Elderly underweight participants have high  
37  
38 mortality,<sup>30</sup> and medical expenditure increases in the 1 year prior to death.<sup>20</sup> Thus,  
39  
40 lifetime medical expenditure from 70 years for underweight participants becomes higher  
41  
42 than for participants of normal weight. Our study results are thus inconsistent with  
43  
44 those reported previously.  
45  
46  
47  
48  
49  
50  
51  
52  
53  
54  
55  
56  
57  
58  
59  
60

1  
2  
3  
4  
5  
6 We previously calculated life expectancy and lifetime medical expenditure for  
7  
8  
9 smokers and non-smokers from age 40 years by using the same dataset as that for the  
10  
11 present study.<sup>17</sup> The results indicated that lifetime medical expenditure was  
12  
13 non-significantly lower in smokers than in non-smokers, reflecting the 3.5 years shorter  
14  
15 life expectancy of smokers. On the other hand, the present study indicated that  
16  
17 lifetime medical expenditure was higher for obese participants in spite of their shorter  
18  
19 life expectancy. This difference would result from the difference in which obesity and  
20  
21 smoking affect one's health and longevity. Previous studies of healthy and disability  
22  
23 free life expectancy have agreed that smoking shortens life expectancy without affecting  
24  
25 the years of life spent with ill-health or disability, while obesity shortens life expectancy  
26  
27 and extends the years of life with ill-health or disability.<sup>31</sup> On the basis of these  
28  
29 differences, Reuser et al. summarized the situation as "smoking kills, and obesity  
30  
31 disables".<sup>7</sup> Extended years with ill-health and/or disability must result in increased  
32  
33 lifetime medical expenditure. All of these findings suggest that weight control would  
34  
35 bring about not only longer life expectancy but also long-term enhancement of the  
36  
37 quality of life and a cost saving.  
38  
39  
40  
41  
42  
43  
44  
45  
46  
47  
48  
49  
50

### 51 **Strengths and limitations**

52  
53 A major strength of our present study is that it is the first in the world to have clarified  
54  
55 the association between BMI and lifetime medical expenditure calculated from  
56  
57  
58  
59  
60

1  
2  
3  
4  
5  
6 individual medical expenditure and mortality data over a long period in a general  
7  
8 population from the age of 40 years.<sup>1 14 16-18</sup> The NHI covers almost all medical-care  
9  
10 utilization.<sup>1 4 14 16 18</sup> Additionally, in order to reduce bias, we adjusted confounders by  
11  
12 including various covariates in our Poisson regression model and linear regression mode.  
13  
14

15  
16 <sup>16</sup> On the other hand, several limitations of our study should also be considered.

17  
18 First, we used self-reported BMI which is a source of error.<sup>32 33</sup> We consider this  
19  
20 error to be a nondifferential misclassification. This misclassification would lead to  
21  
22 attenuation of the true association toward the null. To address this problem, van Dam  
23  
24 et al. studied the association between BMI and mortality using lower BMI cutoff points:  
25  
26 24.5 kg/m<sup>2</sup> to reflect a measured BMI of 25.0 kg/m<sup>2</sup>, and 29.0 kg/m<sup>2</sup> to reflect a  
27  
28 measured BMI of 30.0 kg/m<sup>2</sup>.<sup>34</sup> The association showed similar with original cutoff  
29  
30 points. Second, the 95% CI was wide, and there was a limit to the accurate estimation  
31  
32 of life expectancy and lifetime medical expenditure for obese participants because the  
33  
34 Japanese population has a low prevalence of BMI $\geq$ 30.0 kg/m<sup>2</sup>. However, our results  
35  
36 are consistent with those of previous studies.<sup>6-8 10 12 13</sup>  
37  
38  
39  
40  
41  
42  
43  
44  
45  
46  
47

### 48 **Conclusions and policy implication**

49  
50 In summary, lifetime medical expenditure appears to be higher for obese participants,  
51  
52 despite their short life expectancy. With better weight control, more people would  
53  
54 enjoy their longevity with lower needs and demands for medical care.  
55  
56  
57  
58  
59  
60

**Article focus**

- Obese people have higher needs and demands for medical care.
- Obesity is associated with an increased risk of mortality.
- In view of the decreased life expectancy in obese participants, it is unclear whether lifetime medical expenditure increases or decreases as a result.

**Key messages**

- In spite of their short life expectancy, obese men and women had approximately 14.7% and 21.6% higher lifetime medical expenditure in comparison with normal weight participants, respectively.
- With better weight control, more people would enjoy their longevity with lower needs and demands for medical care.

**Strengths and limitations of this study**

- This is the first study to have investigated the association between BMI, life expectancy, and lifetime medical expenditure calculated from individual medical expenditure and mortality data over a long period in a general population.
- There was a limit to the accurate estimation of life expectancy and lifetime medical expenditure for obese participants because the Japanese population has a low prevalence of BMI $\geq$ 30.0 kg/m<sup>2</sup>.

## Contributions

All authors contributed to the design of the study. Masato Nagai, Shinichi Kuriyama, Masako Kakizaki, Kaori Ohmori-Matsuda, Toshimasa Sone, and Ichiro Tsuji participated in data collection. Masato Nagai, Shinichi Kuriyama, Atsushi Hozawa, Miyuki Kawado, and Shuji Hashimoto participated in data analysis. Masato Nagai, Masako Kakizaki, Kaori Ohmori-Matsuda, Toshimasa Sone, Atsushi Hozawa, Miyuki Kawado, and Shuji Hashimoto participated in the writing of the report. Shinichi Kuriyama and Ichiro Tsuji participated in critical revision of the manuscript. All authors approved the final version of the report for submission.

## Funding

This study was supported by a Health Sciences Research Grant for Health Services (H21-Choju-Ippan-001, H20-Junkankitou (Seisyu)-Ippan-013, H22- Junkankitou (Seisyu)-Ippan-012), Ministry of Health, Labour and Welfare, Japan. Masato Nagai is a recipient of a Research Fellowships of the Japan Society for the Promotion of Science for Young Scientists.

## Conflicts of Interest

The authors declare that they have no conflicts of interest.

**Ethical approval**

The study protocol was approved by the Ethics Committee of Tohoku University School of Medicine. Participants who had returned the self-administered questionnaires and signed them were considered to have consented to participate.

**Data sharing**

No additional data available.

**Figure legend**

Figure 1

Multiadjusted mortality by BMI categories in each age-group in men (a) and women (b).

**References**

1. Kuriyama S, Tsuji I, Ohkubo T, Anzai Y, Takahashi K, Watanabe Y, et al. Medical care expenditure associated with body mass index in Japan: the Ohsaki Study. *Int J Obes Relat Metab Disord* 2002;26(8):1069-74.
2. Detournay B, Fagnani F, Phillippo M, Pribil C, Charles MA, Sermet C, et al. Obesity morbidity and health care costs in France: an analysis of the 1991-1992 Medical Care Household Survey. *Int J Obes Relat Metab Disord* 2000;24(2):151-5.
3. Thompson D, Brown JB, Nichols GA, Elmer PJ, Oster G. Body mass index and future healthcare costs: a retrospective cohort study. *Obes Res* 2001;9(3):210-8.
4. Nakamura K, Okamura T, Kanda H, Hayakawa T, Okayama A, Ueshima H. Medical costs of obese Japanese: a 10-year follow-up study of National Health Insurance in Shiga, Japan. *Eur J Public Health* 2007;17(5):424-9.
5. Quesenberry CP, Jr., Caan B, Jacobson A. Obesity, health services use, and health care costs among members of a health maintenance organization. *Arch Intern Med* 1998;158(5):466-72.
6. Peeters A, Barendregt JJ, Willekens F, Mackenbach JP, Al Mamun A, Bonneux L. Obesity in adulthood and its consequences for life expectancy: a life-table analysis. *Ann Intern Med* 2003;138(1):24-32.
7. Reuser M, Bonneux LG, Willekens FJ. Smoking kills, obesity disables: a multistate approach of the US Health and Retirement Survey. *Obesity (Silver Spring)*



- 2009;17(4):783-9.
8. van Baal PH, Hoogenveen RT, de Wit GA, Boshuizen HC. Estimating health-adjusted life expectancy conditional on risk factors: results for smoking and obesity. *Popul Health Metr* 2006;4:14.
9. Reuser M, Bonneux L, Willekens F. The burden of mortality of obesity at middle and old age is small. A life table analysis of the US Health and Retirement Survey. *Eur J Epidemiol* 2008;23(9):601-7.
10. Thompson D, Edelsberg J, Colditz GA, Bird AP, Oster G. Lifetime health and economic consequences of obesity. *Arch Intern Med* 1999;159(18):2177-83.
11. van Baal PH, Polder JJ, de Wit GA, Hoogenveen RT, Feenstra TL, Boshuizen HC, et al. Lifetime medical costs of obesity: prevention no cure for increasing health expenditure. *PLoS Med* 2008;5(2):e29.
12. Finkelstein EA, Trogon JG, Brown DS, Allaire BT, Dellea PS, Kamal-Bahl SJ. The lifetime medical cost burden of overweight and obesity: implications for obesity prevention. *Obesity (Silver Spring)* 2008;16(8):1843-8.
13. Lakdawalla DN, Goldman DP, Shang B. The health and cost consequences of obesity among the future elderly. *Health Aff (Millwood)* 2005;24 Suppl 2:W5R30-41.
14. Tsuji I, Nishino Y, Ohkubo T, Kuwahara A, Ogawa K, Watanabe Y, et al. A prospective cohort study on National Health Insurance beneficiaries in Ohsaki, Miyagi Prefecture, Japan: study design, profiles of the subjects and medical cost during the

- 1  
2  
3  
4  
5  
6 first year. *J Epidemiol* 1998;8(5):258-63.  
7  
8  
9 15. Kuriyama S, Shimazu T, Ohmori K, Kikuchi N, Nakaya N, Nishino Y, et al. Green tea  
10 consumption and mortality due to cardiovascular disease, cancer, and all causes in  
11 Japan: the Ohsaki study. *JAMA* 2006;296(10):1255-65.  
12  
13  
14 16. Nagai M, Kuriyama S, Kakizaki M, Ohmori-Matsuda K, Sone T, Hozawa A, et al. Impact  
15 of walking on life expectancy and lifetime medical expenditure: the Ohsaki Cohort  
16 Study. *BMJ Open* 2011;1(2):bmjopen2011000240.  
17  
18  
19 17. Hayashida K, Imanaka Y, Murakami G, Takahashi Y, Nagai M, Kuriyama S, et al.  
20 Difference in lifetime medical expenditures between male smokers and non-smokers.  
21 *Health Policy* 2010;94(1):84-9.  
22  
23  
24 18. Tsuji I, Takahashi K, Nishino Y, Ohkubo T, Kuriyama S, Watanabe Y, et al. Impact of  
25 walking upon medical care expenditure in Japan: the Ohsaki Cohort Study. *Int J*  
26 *Epidemiol* 2003;32(5):809-14.  
27  
28  
29 19. World Health Organization. The use and interpretation of anthropometry: report of a WHO expert  
30 committee. *WHO Tech Rep Ser* 1995;854:312-409.  
31  
32  
33 20. Breyer F, Felder S. Life expectancy and health care expenditures: a new calculation for  
34 Germany using the costs of dying. *Health Policy* 2006;75(2):178-86.  
35  
36  
37 21. Chiang CL. *The Life Table and Its Applications*: Krieger Publishing Company, 1983.  
38  
39  
40 22. Statistics and Information Department MsS MoH, Labour and Welfare, Japan. *The 20th*  
41 *Life Tables.*, 2000.  
42  
43  
44  
45  
46  
47  
48  
49  
50  
51  
52  
53  
54  
55  
56  
57  
58  
59  
60

- 1  
2  
3  
4  
5  
6 23. Hayashi R, Iwasaki M, Otani T, Wang N, Miyazaki H, Yoshiaki S, et al. Body mass index  
7  
8 and mortality in a middle-aged Japanese cohort. *J Epidemiol* 2005;15(3):70-7.  
9  
10  
11 24. Hozawa A, Okamura T, Oki I, Murakami Y, Kadowaki T, Nakamura K, et al.  
12  
13 Relationship between BMI and all-cause mortality in Japan: NIPPON DATA80.  
14  
15 *Obesity (Silver Spring)* 2008;16(7):1714-7.  
16  
17  
18 25. Kuriyama S, Ohmori K, Miura C, Suzuki Y, Nakaya N, Fujita K, et al. Body mass index  
19  
20 and mortality in Japan: the Miyagi Cohort Study. *J Epidemiol* 2004;14 Suppl  
21  
22 1:S33-8.  
23  
24  
25  
26  
27 26. Matsuo T, Sairenchi T, Iso H, Irie F, Tanaka K, Fukasawa N, et al. Age- and  
28  
29 gender-specific BMI in terms of the lowest mortality in Japanese general population.  
30  
31 *Obesity (Silver Spring)* 2008;16(10):2348-55.  
32  
33  
34  
35 27. Miyazaki M, Babazono A, Ishii T, Sugie T, Momose Y, Iwahashi M, et al. Effects of low  
36  
37 body mass index and smoking on all-cause mortality among middle-aged and elderly  
38  
39 Japanese. *J Epidemiol* 2002;12(1):40-4.  
40  
41  
42  
43 28. Tamakoshi A, Yatsuya H, Lin Y, Tamakoshi K, Kondo T, Suzuki S, et al. BMI and  
44  
45 all-cause mortality among Japanese older adults: findings from the Japan  
46  
47 collaborative cohort study. *Obesity (Silver Spring)* 2010;18(2):362-9.  
48  
49  
50  
51 29. Tsugane S, Sasaki S, Tsubono Y. Under- and overweight impact on mortality among  
52  
53 middle-aged Japanese men and women: a 10-y follow-up of JPHC study cohort I. *Int*  
54  
55 *J Obes Relat Metab Disord* 2002;26(4):529-37.  
56  
57  
58  
59  
60

- 1  
2  
3  
4  
5  
6 30. Grabowski DC, Ellis JE. High body mass index does not predict mortality in older  
7  
8 people: analysis of the Longitudinal Study of Aging. *J Am Geriatr Soc*  
9  
10 2001;49(7):968-79.  
11  
12  
13 31. LaCroix AZ, Guralnik JM, Berkman LF, Wallace RB, Satterfield S. Maintaining mobility  
14  
15 in late life. II. Smoking, alcohol consumption, physical activity, and body mass index.  
16  
17 *Am J Epidemiol* 1993;137(8):858-69.  
18  
19  
20 32. Niedhammer I, Bugel I, Bonenfant S, Goldberg M, Leclerc A. Validity of self-reported  
21  
22 weight and height in the French GAZEL cohort. *Int J Obes Relat Metab Disord*  
23  
24 2000;24(9):1111-8.  
25  
26  
27 33. Gillum RF, Sempos CT. Ethnic variation in validity of classification of overweight and  
28  
29 obesity using self-reported weight and height in American women and men: the  
30  
31 Third National Health and Nutrition Examination Survey. *Nutr J* 2005;4:27.  
32  
33  
34 34. van Dam RM, Willett WC, Manson JE, Hu FB. The relationship between overweight in  
35  
36 adolescence and premature death in women. *Ann Intern Med* 2006;145(2):91-7.  
37  
38  
39  
40  
41  
42  
43  
44  
45  
46  
47  
48  
49  
50  
51  
52  
53  
54  
55  
56  
57  
58  
59  
60

Table 1 Baseline characteristics by BMI<sup>a</sup> categories in 41,965 participants.

|                                  | Men                      |           |           |       |                             | Women                    |           |           |       |                |
|----------------------------------|--------------------------|-----------|-----------|-------|-----------------------------|--------------------------|-----------|-----------|-------|----------------|
|                                  | BMI (kg/m <sup>2</sup> ) |           |           |       | <i>p</i> value <sup>b</sup> | BMI (kg/m <sup>2</sup> ) |           |           |       | <i>p</i> value |
|                                  | <18.5                    | 18.5-24.9 | 25.0-29.9 | ≥30.0 |                             | <18.5                    | 18.5-24.9 | 25.0-29.9 | ≥30.0 |                |
| No. of subjects                  | 666                      | 14,278    | 4,730     | 392   |                             | 857                      | 14,031    | 6,226     | 785   |                |
| Mean age (years)                 | 64.0                     | 59.1      | 57.4      | 56.1  | <.0001                      | 63.7                     | 59.8      | 60.7      | 61.2  | <.0001         |
| SD <sup>a</sup>                  | 10.4                     | 10.5      | 10.2      | 10.2  |                             | 10.9                     | 10.1      | 9.1       | 9.5   |                |
| Smoking status (%)               |                          |           |           |       |                             |                          |           |           |       |                |
| Current and Past smoker          | 87.3                     | 82.5      | 76.6      | 74.8  | <.0001                      | 18.6                     | 11.2      | 10.1      | 10.6  | <.0001         |
| Never smoker                     | 12.7                     | 17.5      | 23.4      | 25.2  |                             | 81.4                     | 88.8      | 90.0      | 89.4  |                |
| Alcohol consumption (%)          |                          |           |           |       |                             |                          |           |           |       |                |
| Current drinker, 1-449 g/week    | 49.2                     | 61.0      | 61.4      | 50.8  | <.0001                      | 18.2                     | 21.8      | 21.4      | 19.3  | 0.0574         |
| Current drinker, ≥450 g/week     | 9.6                      | 11.7      | 12.6      | 15.0  |                             | 0.6                      | 0.8       | 0.5       | 0.9   |                |
| Never and past drinker           | 41.2                     | 27.3      | 26.0      | 34.2  |                             | 81.2                     | 77.4      | 78.2      | 79.8  |                |
| Sports and physical exercise (%) |                          |           |           |       |                             |                          |           |           |       |                |
| ≥3 hours/week                    | 17.5                     | 16.1      | 13.8      | 10.1  | <.0001                      | 9.8                      | 11.3      | 11.0      | 10.8  | 0.5993         |
| <3 hour/week                     | 82.5                     | 83.9      | 86.2      | 89.9  |                             | 90.2                     | 88.7      | 89.0      | 89.2  |                |
| Time spent walking (%)           |                          |           |           |       |                             |                          |           |           |       |                |
| ≥1 hour/day                      | 41.7                     | 51.4      | 45.8      | 42.7  | <.0001                      | 37.9                     | 45.1      | 41.0      | 35.6  | <.0001         |
| <1 hour/day                      | 58.3                     | 48.7      | 54.2      | 57.3  |                             | 62.1                     | 54.9      | 59.0      | 64.4  |                |
| Education (%)                    |                          |           |           |       |                             |                          |           |           |       |                |
| Junior high school               | 64.2                     | 62.2      | 58.9      | 58.8  | 0.0013                      | 58.3                     | 54.2      | 62.7      | 71.3  | <.0001         |
| High school                      | 27.4                     | 30.5      | 33.4      | 33.4  |                             | 34.0                     | 36.9      | 31.0      | 24.6  |                |
| College/university or higher     | 8.4                      | 7.3       | 7.7       | 7.8   |                             | 7.7                      | 8.9       | 6.3       | 4.1   |                |

<sup>a</sup> BMI, body mass index; SD, standard deviation.<sup>b</sup> *p* values were calculated by chi-squared test (categorical variables) or ANOVA (continuous variables).

Table 2. Mortality ratio for BMI<sup>a</sup> categories in 41,965 participants.

|       | BMI (kg/m <sup>2</sup> ) | Univariate      |                         |                | Multiadjusted <sup>b</sup> |                         |                |
|-------|--------------------------|-----------------|-------------------------|----------------|----------------------------|-------------------------|----------------|
|       |                          | Mortality ratio | 95% confidence interval | <i>p</i> value | Mortality ratio            | 95% confidence interval | <i>p</i> value |
| Men   | <18.5                    | 1.69            | 1.47 - 1.93             | <.0001         | 1.62                       | 1.41 - 1.86             | <.0001         |
|       | 18.5-24.9                | 1.00            | Reference               |                | 1.00                       | Reference               |                |
|       | 25.0-29.9                | 0.90            | 0.82 - 0.98             | 0.0163         | 0.91                       | 0.83 - 0.99             | 0.0260         |
|       | ≥30.0                    | 1.13            | 0.87 - 1.47             | 0.3712         | 1.14                       | 0.88 - 1.49             | 0.3177         |
| Women | <18.5                    | 1.50            | 1.25 - 1.81             | <.0001         | 1.46                       | 1.22 - 1.76             | <.0001         |
|       | 18.5-24.9                | 1.00            | Reference               |                | 1.00                       | Reference               |                |
|       | 25.0-29.9                | 1.00            | 0.89 - 1.11             | 0.9613         | 0.98                       | 0.88 - 1.10             | 0.7841         |
|       | ≥30.0                    | 1.29            | 1.03 - 1.62             | 0.0273         | 1.23                       | 0.98 - 1.55             | 0.0717         |

<sup>a</sup> BMI, body mass index.

<sup>b</sup> Adjusted for age groups, smoking status, alcohol drinking, sports and physical exercise, time spent walking, and education.

Table 3. Life expectancy and lifetime medical expenditure at age 40 years for BMI<sup>a</sup> categories in 41,965 participants.

| BMI (kg/m <sup>2</sup> ) | Univariate                                       |                       |                | Multadjusted <sup>b</sup> |                       |                |
|--------------------------|--------------------------------------------------|-----------------------|----------------|---------------------------|-----------------------|----------------|
|                          | Estimate                                         | 95% confidence        | <i>p</i> value | Estimate                  | 95% confidence        | <i>p</i> value |
| Men                      | Life expectancy at age 40 years (years)          |                       |                |                           |                       |                |
| <18.5                    | 36.72                                            | 35.10 - 38.17         | <.0001         | 37.40                     | 35.80 - 38.87         | <.0001         |
| 18.5-24.9                | 42.70                                            | 41.91 - 43.37         | Reference      | 43.03                     | 42.22 - 43.73         | Reference      |
| 25.0-29.9                | 44.09                                            | 42.89 - 45.25         | 0.0157         | 44.34                     | 43.11 - 45.54         | 0.0264         |
| ≥30.0                    | 41.23                                            | 38.16 - 44.54         | 0.3733         | 41.36                     | 38.28 - 44.70         | 0.3184         |
|                          | Lifetime medical expenditure at age 40 years (£) |                       |                |                           |                       |                |
| <18.5                    | 94,877.5                                         | 83,411.4 - 106,275.7  | 0.6846         | 93,208.7                  | 81,704.9 - 104,706.4  | 0.3916         |
| 18.5-24.9                | 97,244.1                                         | 92,662.5 - 101,774.0  | Reference      | 98,355.0                  | 93,615.3 - 103,010.2  | Reference      |
| 25.0-29.9                | 114,398.2                                        | 107,490.1 - 121,505.3 | <.0001         | 114,766.9                 | 107,754.1 - 121,966.6 | <.0001         |
| ≥30.0                    | 115,362.6                                        | 97,361.8 - 134,555.0  | 0.0501         | 112,858.9                 | 94,954.1 - 131,840.9  | 0.1141         |
| Women                    | Life expectancy at age 40 years (years)          |                       |                |                           |                       |                |
| <18.5                    | 46.26                                            | 43.98 - 48.43         | <.0001         | 46.98                     | 44.63 - 49.29         | <.0001         |
| 18.5-24.9                | 51.70                                            | 50.28 - 53.02         | Reference      | 52.31                     | 50.79 - 53.75         | Reference      |
| 25.0-29.9                | 51.74                                            | 49.98 - 53.48         | 0.9582         | 52.56                     | 50.67 - 54.46         | 0.7797         |
| ≥30.0                    | 48.13                                            | 45.23 - 51.22         | 0.0272         | 49.23                     | 46.14 - 52.59         | 0.0724         |
|                          | Lifetime medical expenditure at age 40 years (£) |                       |                |                           |                       |                |
| <18.5                    | 108,278.3                                        | 97,142.8 - 119,593.7  | 0.5816         | 109,382.2                 | 97,996.6 - 121,008.6  | 0.5174         |
| 18.5-24.9                | 111,512.8                                        | 105,303.4 - 117,910.4 | Reference      | 113,282.9                 | 106,668.0 - 120,054.6 | Reference      |
| 25.0-29.9                | 127,869.3                                        | 120,236.3 - 135,932.3 | <.0001         | 129,964.6                 | 121,845.4 - 138,577.2 | <.0001         |
| ≥30.0                    | 134,887.1                                        | 121,318.4 - 149,383.6 | 0.0007         | 137,765.9                 | 123,672.9 - 152,970.2 | 0.0005         |

<sup>a</sup> BMI, body mass index.<sup>b</sup> Adjusted for age groups, smoking status, alcohol drinking, sports and physical exercise, time spent walking, and education.

Figure 1-a

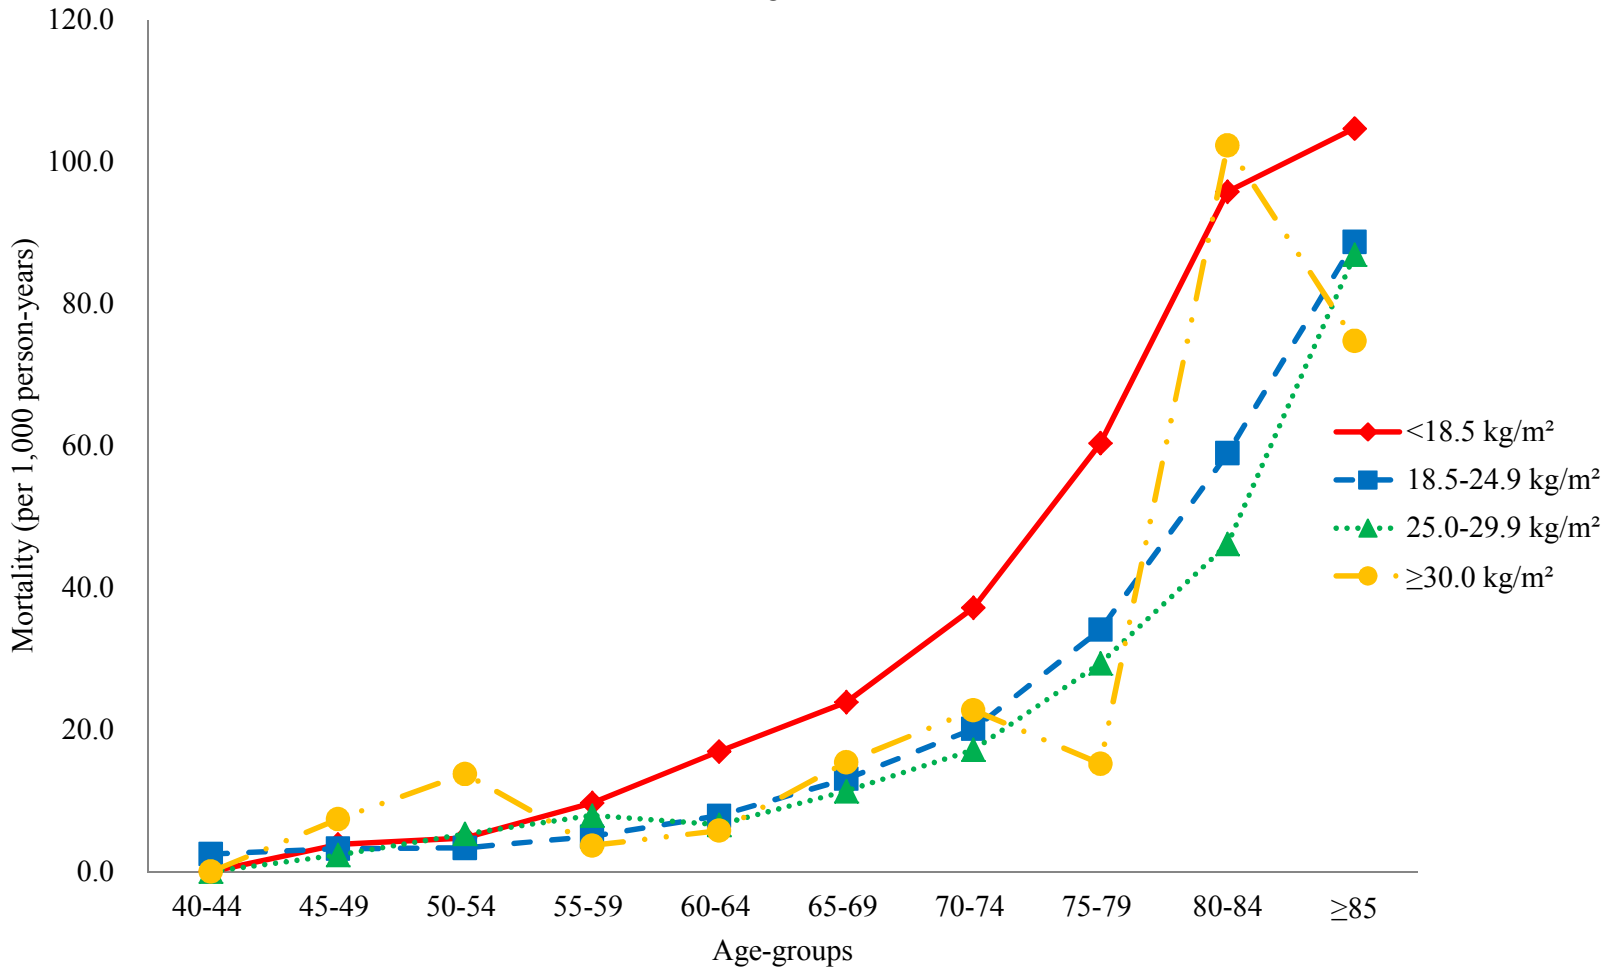



Figure 1-b

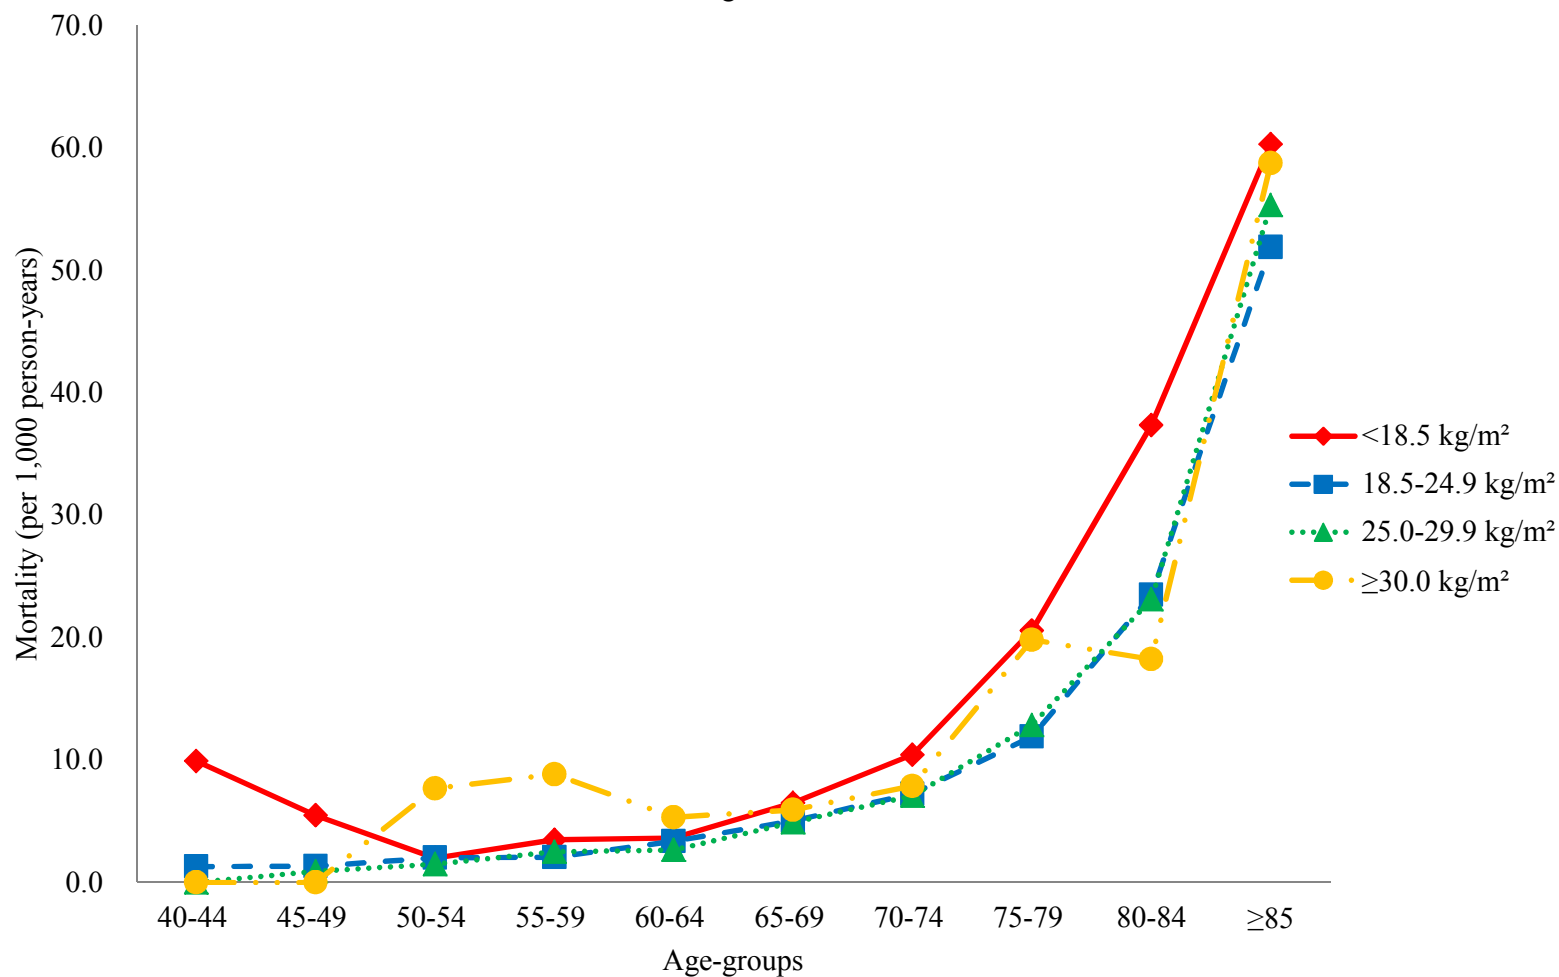

## ANALYSIS

deemed to be important to include in checklists for each type of study. A provisional list of items prepared in advance (available from our website) was used to facilitate discussions. The three draft checklists were then discussed by all participants and, where possible, items were revised to make them applicable to all three study

designs. In a final plenary session, the group decided on the strategy for finalising and disseminating the STROBE statement.

After the workshop we drafted a combined checklist including all three designs and made it available on our website. We invited participants and additional scientists

STROBE statement—checklist of items that should be included in reports of observational studies

|                           | Item No | Recommendation                                                                                                                                                                                                                                                                                                                                                                                                                                                                                                                                                                                                                                                                                     |
|---------------------------|---------|----------------------------------------------------------------------------------------------------------------------------------------------------------------------------------------------------------------------------------------------------------------------------------------------------------------------------------------------------------------------------------------------------------------------------------------------------------------------------------------------------------------------------------------------------------------------------------------------------------------------------------------------------------------------------------------------------|
| <b>Title and abstract</b> |         |                                                                                                                                                                                                                                                                                                                                                                                                                                                                                                                                                                                                                                                                                                    |
|                           | 1       | ✓ (a) Indicate the study's design with a commonly used term in the title or the abstract<br>✓ (b) Provide in the abstract an informative and balanced summary of what was done and what was found                                                                                                                                                                                                                                                                                                                                                                                                                                                                                                  |
| <b>Introduction</b>       |         |                                                                                                                                                                                                                                                                                                                                                                                                                                                                                                                                                                                                                                                                                                    |
| Background/rationale      | 2       | ✓ Explain the scientific background and rationale for the investigation being reported                                                                                                                                                                                                                                                                                                                                                                                                                                                                                                                                                                                                             |
| Objectives                | 3       | ✓ State specific objectives, including any prespecified hypotheses                                                                                                                                                                                                                                                                                                                                                                                                                                                                                                                                                                                                                                 |
| <b>Methods</b>            |         |                                                                                                                                                                                                                                                                                                                                                                                                                                                                                                                                                                                                                                                                                                    |
| Study design              | 4       | ✓ Present key elements of study design early in the paper                                                                                                                                                                                                                                                                                                                                                                                                                                                                                                                                                                                                                                          |
| Setting                   | 5       | ✓ Describe the setting, locations, and relevant dates, including periods of recruitment, exposure, follow-up, and data collection                                                                                                                                                                                                                                                                                                                                                                                                                                                                                                                                                                  |
| Participants              | 6       | ✓ (a) <i>Cohort study</i> —Give the eligibility criteria, and the sources and methods of selection of participants. Describe methods of follow-up<br><i>Case-control study</i> —Give the eligibility criteria, and the sources and methods of case ascertainment and control selection. Give the rationale for the choice of cases and controls<br><i>Cross sectional study</i> —Give the eligibility criteria, and the sources and methods of selection of participants<br>(b) <i>Cohort study</i> —For matched studies, give matching criteria and number of exposed and unexposed<br><i>Case-control study</i> —For matched studies, give matching criteria and the number of controls per case |
| Variables                 | 7       | ✓ Clearly define all outcomes, exposures, predictors, potential confounders, and effect modifiers. Give diagnostic criteria, if applicable                                                                                                                                                                                                                                                                                                                                                                                                                                                                                                                                                         |
| Data sources/ measurement | 8*      | ✓ For each variable of interest, give sources of data and details of methods of assessment (measurement). Describe comparability of assessment methods if there is more than one group                                                                                                                                                                                                                                                                                                                                                                                                                                                                                                             |
| Bias                      | 9       | ✓ Describe any efforts to address potential sources of bias                                                                                                                                                                                                                                                                                                                                                                                                                                                                                                                                                                                                                                        |
| Study size                | 10      | ✓ Explain how the study size was arrived at                                                                                                                                                                                                                                                                                                                                                                                                                                                                                                                                                                                                                                                        |
| Quantitative variables    | 11      | ✓ Explain how quantitative variables were handled in the analyses. If applicable, describe which groupings were chosen and why                                                                                                                                                                                                                                                                                                                                                                                                                                                                                                                                                                     |
| Statistical methods       | 12      | ✓ (a) Describe all statistical methods, including those used to control for confounding<br>✓ (b) Describe any methods used to examine subgroups and interactions<br>✓ (c) Explain how missing data were addressed<br>✓ (d) <i>Cohort study</i> —If applicable, explain how loss to follow-up was addressed<br><i>Case-control study</i> —If applicable, explain how matching of cases and controls was addressed<br><i>Cross sectional study</i> —If applicable, describe analytical methods taking account of sampling strategy<br>✓ (e) Describe any sensitivity analyses                                                                                                                        |
| <b>Results</b>            |         |                                                                                                                                                                                                                                                                                                                                                                                                                                                                                                                                                                                                                                                                                                    |
| Participants              | 13*     | ✓ (a) Report numbers of individuals at each stage of study—eg numbers potentially eligible, examined for eligibility, confirmed eligible, included in the study, completing follow-up, and analysed<br>✓ (b) Give reasons for non-participation at each stage<br>(c) Consider use of a flow diagram                                                                                                                                                                                                                                                                                                                                                                                                |
| Descriptive data          | 14*     | ✓ (a) Give characteristics of study participants (eg demographic, clinical, social) and information on exposures and potential confounders<br>(b) Indicate number of participants with missing data for each variable of interest<br>✓ (c) <i>Cohort study</i> —Summarise follow-up time (eg average and total amount)                                                                                                                                                                                                                                                                                                                                                                             |
| Outcome data              | 15*     | ✓ <i>Cohort study</i> —Report numbers of outcome events or summary measures over time<br><i>Case-control study</i> —Report numbers in each exposure category, or summary measures of exposure<br><i>Cross sectional study</i> —Report numbers of outcome events or summary measures                                                                                                                                                                                                                                                                                                                                                                                                                |
| Main results              | 16      | ✓ (a) Report the numbers of individuals at each stage of the study—eg numbers potentially eligible, examined for eligibility, confirmed eligible, included in the study, completing follow-up, and analysed<br>✓ (b) Give reasons for non-participation at each stage<br>(c) Consider use of a flow diagram                                                                                                                                                                                                                                                                                                                                                                                        |
| Other analyses            | 17      | Report other analyses done—eg analyses of subgroups and interactions, and sensitivity analyses                                                                                                                                                                                                                                                                                                                                                                                                                                                                                                                                                                                                     |
| <b>Discussion</b>         |         |                                                                                                                                                                                                                                                                                                                                                                                                                                                                                                                                                                                                                                                                                                    |
| Key results               | 18      | ✓ Summarise key results with reference to study objectives                                                                                                                                                                                                                                                                                                                                                                                                                                                                                                                                                                                                                                         |
| Limitations               | 19      | ✓ Discuss limitations of the study, taking into account sources of potential bias or imprecision. Discuss both direction and magnitude of any potential bias                                                                                                                                                                                                                                                                                                                                                                                                                                                                                                                                       |
| Interpretation            | 20      | ✓ Give a cautious overall interpretation of results considering objectives, limitations, multiplicity of analyses, results from similar studies, and other relevant evidence                                                                                                                                                                                                                                                                                                                                                                                                                                                                                                                       |
| Generalisability          | 21      | ✓ Discuss the generalisability (external validity) of the study results                                                                                                                                                                                                                                                                                                                                                                                                                                                                                                                                                                                                                            |
| Other information         |         |                                                                                                                                                                                                                                                                                                                                                                                                                                                                                                                                                                                                                                                                                                    |
| Funding                   | 22      | ✓ Give the source of funding and the role of the funders for the present study and, if applicable, for the original study on which the present article is based                                                                                                                                                                                                                                                                                                                                                                                                                                                                                                                                    |

\*Give information separately for cases and controls in case-control studies and, if applicable, for exposed and unexposed groups in cohort and cross sectional studies.

The STROBE checklist is best used in conjunction with the explanation and elaboration article.<sup>18-20</sup> This article and separate versions of the checklist for cohort, case-control, and cross sectional studies are available at [www.strobe-statement.org](http://www.strobe-statement.org).



**Impact of Obesity, Overweight and Underweight on Life Expectancy and Lifetime Medical Expenditures: The Ohsaki Cohort Study**

|                                 |                                                                                                                                                                                                                                                                                                                                                                                                                                                                                                                                                                                                                                                                                                                                                                                                                                                                                                                                                                                                                                                                                                                                                                                                                                                                                                                                                                                                                                                                                                                                                                   |
|---------------------------------|-------------------------------------------------------------------------------------------------------------------------------------------------------------------------------------------------------------------------------------------------------------------------------------------------------------------------------------------------------------------------------------------------------------------------------------------------------------------------------------------------------------------------------------------------------------------------------------------------------------------------------------------------------------------------------------------------------------------------------------------------------------------------------------------------------------------------------------------------------------------------------------------------------------------------------------------------------------------------------------------------------------------------------------------------------------------------------------------------------------------------------------------------------------------------------------------------------------------------------------------------------------------------------------------------------------------------------------------------------------------------------------------------------------------------------------------------------------------------------------------------------------------------------------------------------------------|
| Journal:                        | <i>BMJ Open</i>                                                                                                                                                                                                                                                                                                                                                                                                                                                                                                                                                                                                                                                                                                                                                                                                                                                                                                                                                                                                                                                                                                                                                                                                                                                                                                                                                                                                                                                                                                                                                   |
| Manuscript ID:                  | bmjopen-2012-000940.R1                                                                                                                                                                                                                                                                                                                                                                                                                                                                                                                                                                                                                                                                                                                                                                                                                                                                                                                                                                                                                                                                                                                                                                                                                                                                                                                                                                                                                                                                                                                                            |
| Article Type:                   | Research                                                                                                                                                                                                                                                                                                                                                                                                                                                                                                                                                                                                                                                                                                                                                                                                                                                                                                                                                                                                                                                                                                                                                                                                                                                                                                                                                                                                                                                                                                                                                          |
| Date Submitted by the Author:   | 27-Mar-2012                                                                                                                                                                                                                                                                                                                                                                                                                                                                                                                                                                                                                                                                                                                                                                                                                                                                                                                                                                                                                                                                                                                                                                                                                                                                                                                                                                                                                                                                                                                                                       |
| Complete List of Authors:       | <p>Nagai, Masato; Tohoku University Graduate School of Medicine, Division of Epidemiology, Department of Public Health and Forensic Medicine<br/>           Kuriyama, Shinichi; Tohoku University Graduate School of Medicine, Division of Epidemiology, Department of Public Health and Forensic Medicine; Tohoku University Graduate School of Medicine, Department of Molecular Epidemiology, Environment and Genome Research Center<br/>           Kakizaki, Masako; Tohoku University Graduate School of Medicine, Division of Epidemiology, Department of Public Health and Forensic Medicine<br/>           Ohmori-Matsuda, Kaori; Tohoku University Graduate School of Medicine, Division of Epidemiology, Department of Public Health and Forensic Medicine<br/>           Sone, Toshimasa; Tohoku University Graduate School of Medicine, Division of Epidemiology, Department of Public Health and Forensic Medicine<br/>           Hozawa, Atsushi; Tohoku University Graduate School of Medicine, Division of Epidemiology, Department of Public Health and Forensic Medicine;<br/>           Yamagata University Graduate School of Medical Science, Department of Public Health<br/>           Kawado, Miyuki; Fujita Health University School of Medicine, Department of Hygiene<br/>           Hashimoto, Shuji; Fujita Health University School of Medicine, Department of Hygiene<br/>           Tsuji, Ichiro; Tohoku University Graduate School of Medicine, Division of Epidemiology, Department of Public Health and Forensic Medicine</p> |
| <b>Primary Subject Heading</b>: | Epidemiology                                                                                                                                                                                                                                                                                                                                                                                                                                                                                                                                                                                                                                                                                                                                                                                                                                                                                                                                                                                                                                                                                                                                                                                                                                                                                                                                                                                                                                                                                                                                                      |
| Secondary Subject Heading:      | Health economics, Public health, Cardiovascular medicine, Nutrition and metabolism                                                                                                                                                                                                                                                                                                                                                                                                                                                                                                                                                                                                                                                                                                                                                                                                                                                                                                                                                                                                                                                                                                                                                                                                                                                                                                                                                                                                                                                                                |
| Keywords:                       | Body mass index, Life expectancy, Lifetime medical expenditure, Longevity, Obesity                                                                                                                                                                                                                                                                                                                                                                                                                                                                                                                                                                                                                                                                                                                                                                                                                                                                                                                                                                                                                                                                                                                                                                                                                                                                                                                                                                                                                                                                                |
|                                 |                                                                                                                                                                                                                                                                                                                                                                                                                                                                                                                                                                                                                                                                                                                                                                                                                                                                                                                                                                                                                                                                                                                                                                                                                                                                                                                                                                                                                                                                                                                                                                   |

SCHOLARONE™  
Manuscripts

**Research****Impact of Obesity, Overweight and Underweight on Life Expectancy and Lifetime****Medical Expenditures: The Ohsaki Cohort Study**

Running Title: BMI, Life Expectancy, and Lifetime Medical Cost

Masato Nagai, PhD<sup>1</sup>, Shinichi Kuriyama, MD, PhD<sup>1,2</sup>, Masako Kakizaki, PhD<sup>1</sup>, Kaori

Ohmori-Matsuda, MD, PhD<sup>1</sup>, Toshimasa Sone, MSc<sup>1</sup>, Atsushi Hozawa, MD, PhD<sup>1,3</sup>,

Miyuki Kawado, PhD<sup>4</sup>, Shuji Hashimoto, PhD<sup>4</sup>, and Ichiro Tsuji, MD, PhD<sup>1</sup>

<sup>1</sup> Division of Epidemiology, Department of Public Health and Forensic Medicine,

Tohoku University Graduate School of Medicine, Sendai, Japan

<sup>2</sup> Department of Molecular Epidemiology, Environment and Genome Research Center,

Tohoku University Graduate School of Medicine, Sendai, Japan

<sup>3</sup> Department of Public Health, Yamagata University Graduate School of Medical

Science, Yamagata, Japan

<sup>4</sup> Department of Hygiene, Fujita Health University School of Medicine, Toyoake, Japan

**Address for correspondence:**

Masato Nagai, PhD.

1  
2  
3  
4  
5  
6 Division of Epidemiology, Department of Public Health and Forensic Medicine, Tohoku  
7

8 University Graduate School of Medicine, Sendai, Japan  
9

10  
11 2-1 Seiryō-machi, Aoba-ku, Sendai, Miyagi, 980-8575, Japan  
12

13  
14 Phone: +81-22-717-8123  
15

16  
17 Fax: +81-22-717-8125  
18

19 E-mail: [m-nagai@med.tohoku.ac.jp](mailto:m-nagai@med.tohoku.ac.jp)  
20  
21  
22  
23

24 Manuscript information:  
25

26  
27 #Financial support: This study was supported by a Health Sciences Research Grant for  
28

29 Health Services (H21-Choju-Ippan-001, H20-Junkankitou (Seisyu)-Ippan-013, H22-  
30

31 Junkankitou (Seisyu)-Ippan-012), Ministry of Health, Labour and Welfare, Japan.  
32

33  
34 Masato Nagai is a recipient of a Research Fellowships of the Japan Society for the  
35

36 Promotion of Science for Young Scientists.  
37  
38  
39  
40  
41  
42

43 #Word counts: 3,110  
44

45 #References: 37  
46  
47

48 #Tables: 3  
49

50 #Figures: 2  
51  
52

53 #Page: 33  
54  
55  
56  
57  
58  
59  
60

**Abstract****Objectives**

People who are obese have higher demands for medical care than those of normal weight. However, in view of their shorter life expectancy, it is unclear whether obese people have higher lifetime medical expenditure. We examined the association between body mass index (BMI), life expectancy, and lifetime medical expenditure.

**Design**

Prospective cohort study using individual data from the Ohsaki Cohort Study.

**Setting**

Miyagi Prefecture, northeastern Japan.

**Participants**

The 41,965 participants aged 40-79 years.

**Primary and secondary outcome measures**

The life expectancy and lifetime medical expenditure aged from 40 years.

**Results**

In spite of their shorter life expectancy, obese participants might require higher medical expenditure than normal weight participants. In men aged 40 years, multiadjusted life expectancy for those who were obese participants was 41.4 years (95% CIs; 38.28-44.70), which was 1.7 years non-significantly shorter than that for normal weight participants ( $p=0.3184$ ). Multiadjusted lifetime medical expenditure for obese

1  
2  
3  
4  
5  
6 participants was £112,858.9 (94,954.1-131,840.9), being 14.7% non-significantly higher  
7  
8 than that for normal weight participants ( $p=0.1141$ ). In women aged 40 years,  
9  
10 multiadjusted life expectancy for those who were obese participants was 49.2 years  
11  
12 (46.14-52.59), which was 3.1 years non-significantly shorter than for normal weight  
13  
14 participants ( $p=0.0724$ ), and multiadjusted lifetime medical expenditure was £137,765.9  
15  
16 (123,672.9-152,970.2), being 21.6% significantly higher ( $p=0.0005$ ).  
17  
18  
19  
20

## 21 **Conclusions**

22  
23 According to the point estimate, lifetime medical expenditure might appear to be higher  
24  
25 for obese participants, despite their short life expectancy. With weight control, more  
26  
27 people would enjoy their longevity with lower demands for medical care.  
28  
29  
30

31  
32 (242 words)  
33  
34  
35  
36

37 **Key Words:** Body mass index; Life expectancy; Lifetime medical expenditure;  
38  
39 Longevity; Obesity;  
40  
41  
42  
43  
44  
45  
46  
47  
48  
49  
50  
51  
52  
53  
54  
55  
56  
57  
58  
59  
60

## Introduction

Obesity is closely associated with an increased risk of cardiovascular disease (CVD), cancer, hypertension, diabetes mellitus, and other medical problems. Previous studies have reported that obese and overweight people have higher needs and demands for medical care than normal weight people.<sup>1-5</sup> However, it is unclear whether obese people have higher lifetime medical expenditure than those of normal weight, because the former have a comparatively shorter life expectancy.<sup>6-10</sup> Additionally, underweight people have a higher risk of mortality, and thus also tend to have higher medical expenditure per month or per person, based on a 10-year follow-up.<sup>14</sup>

Although four previous studies have examined the association between obesity and lifetime medical expenditure,<sup>10-13</sup> the results were inconsistent. One study showed that obese people had lower lifetime medical expenditure than those of normal weight,<sup>11</sup> whereas the others indicated that obese people had higher lifetime medical expenditure.<sup>10 12 13</sup> In addition, two of the four studies estimated lifetime medical expenditure from excess risk of cause-specific mortality and mean medical expenditure for the index disease.<sup>10 11</sup> Only the other two studies calculated lifetime medical expenditure on the basis of individual medical expenditure and mortality.<sup>12 13</sup> However, one of those studies followed up the participants for only 2 years,<sup>12</sup> and the



1  
2  
3  
4  
5  
6 other calculated lifetime medical expenditure for elderly participants aged 70 years or  
7  
8 over.<sup>13</sup> Therefore, the association between body mass index (BMI) and lifetime  
9  
10 medical expenditure remains to be fully clarified.  
11  
12

13  
14 We therefore conducted a 13-year prospective observation of 41,965 Japanese  
15  
16 adults aged 40-79 years living in the community, which accrued 392,860 person-years.  
17  
18 We examined the association between BMI and lifetime medical expenditure, based on  
19  
20 individual medical expenditure and life table analysis.<sup>14-17</sup> For all participants, this  
21  
22 cohort study collected data for survival and all medical-care utilization and costs,  
23  
24 excluding home care services provided home health aides, nursing home care, and  
25  
26 preventive health services.  
27  
28  
29  
30  
31  
32  
33  
34  
35  
36  
37  
38  
39  
40  
41  
42  
43  
44  
45  
46  
47  
48  
49  
50  
51  
52  
53  
54  
55  
56  
57  
58  
59  
60

## Materials and methods

### Study cohort

We used data from the Ohsaki National Health Insurance (NHI) Cohort Study.<sup>1 14 16-18</sup>

In brief, we sent a self-administered questionnaire on various lifestyle habits between October and December 1994 to all NHI beneficiaries living in the catchment area of Ohsaki Public Health Center, Miyagi Prefecture, northeastern Japan. A survey was conducted of NHI beneficiaries aged 40 to 79 years. Among 54,996 eligible individuals, 52,029 (95%) responded.

We excluded 776 participants who had withdrawn from the NHI before January 1, 1995, when we started the prospective collection of NHI claim files. Thus, 51,253 participants formed the study cohort. The study protocol was approved by the Ethics Committee of Tohoku University School of Medicine. The participants who had returned the self-administered questionnaires and had signed them were considered to have consented to participate in this study.

For the current analysis, we also excluded participants who did not provide information about body weight and height (n=3,543), were at both extremes of the BMI range: lower than the 0.05th percentile for BMI (below 14.41 for men; below 13.67 for women) or higher than the 99.95th percentile for BMI (above 58.46 for men; above 62.00 for women; n=48), those who died within the first year (n=454), or those who had

1  
2  
3  
4  
5  
6 a history of cancer (n=1,533), myocardial infarction (n=1,233), stroke (n=831), or  
7  
8 kidney disease (n=1,646). Thus, a total of 41,965 participants (20,066 men and 21,899  
9  
10 women) participated.  
11  
12

### 13 14 15 16 17 **Body mass index**

18  
19 The self-administered questionnaire included questions on weight and height, and BMI  
20  
21 was calculated as weight divided by the square of height (kg/m<sup>2</sup>). We divided the  
22  
23 participants into groups according to the following BMI categories: <18.5  
24  
25 (underweight), 18.5-24.9 (normal weight), 25.0-29.9 (overweight), and ≥30.0 kg/m<sup>2</sup>  
26  
27 (obesity). These BMI categories correspond to the cut-off points proposed by the  
28  
29 World Health Organization (WHO): normal BMI range (18.5-24.9 kg/m<sup>2</sup>), grade 1  
30  
31 overweight (25.0-29.9 kg/m<sup>2</sup>), grade 2 overweight (30.0-39.9 kg/m<sup>2</sup>), and grade 3  
32  
33 overweight (≥40.0 kg/m<sup>2</sup>).<sup>19</sup>  
34  
35  
36  
37  
38  
39

40 The validity of self-reported body weight and height has been reported earlier<sup>1</sup>.  
41  
42 Briefly, the weight and height of 14,883 participants, who were a subsample of the  
43  
44 cohort, were measured during basic health examinations provided by local governments  
45  
46 in 1995. The Pearson correlation coefficient (r) and weighted kappa (κ) between the  
47  
48 self-reported values and measured values was r=0.96 (p<.01) for weight, r=0.93 (p<.01)  
49  
50 for height, and r=0.88 (p<.01) and κ=0.72 for BMI categories.  
51  
52  
53  
54  
55  
56  
57  
58  
59  
60

## Health insurance system in Japan

The details of the NHI system have been described previously.<sup>1 4 14 16 18</sup> Briefly, everyone living in Japan is required to enroll in one health insurance system. The NHI covers 35% of the Japanese population for almost all medical treatment, including diagnostic tests, medication, surgery, supplies and materials, physicians and other personnel costs, and most dental treatment. It also covers home care services provided by physicians and nurses but not those by other professionals such as home health aides. The NHI covers inpatient care but not nursing home care. Also, it does not cover preventive health services such as mass screening and health education. Payment to medical providers is made on a fee-for-service basis, where the price of each service is determined by a uniform national fee schedule.

If a participant withdrew from the NHI system because of death, emigration, or employment, the withdrawal date and the reason for withdrawal were coded in the NHI withdrawal history files. We recorded any mortality or migration by reviewing the NHI withdrawal history files and collected data on the death of participants by reviewing the death certificates filed at Ohsaki Public Health Center. We then followed up the participants and prospectively collected data on medical care utilization and its costs for all participants in the cohort from January 1, 1995 through December 31, 2007.

## Statistical analysis

We conducted the same analysis as previous study about the association between walking, life expectancy, and lifetime medical expenditure.<sup>16</sup> Briefly, we divided the age-groups (x) from 40 years according to the following categories: 40-44, 45-49, 50-54, 55-59, 60,64, 65-69, 70-74, 75-79, 80-84, and  $\geq 85$  years. Based on person-years and the number of deaths from 1996 until 2007, the multiadjusted mortality rates for each age category were estimated from a Poisson regression model. The dependent variable was mortality and independent variables were age-groups, categories of BMI, and the following covariates: smoking status (current and past smoker, or never smoker), alcohol consumption (current drinker consuming 1-499 g/week, current drinker consuming  $\geq 450$  g/week, or never and past drinker), sports and physical exercise ( $\geq 3$  hours/week or  $< 3$  hours/week), time spent walking ( $\geq 1$  hours/week or  $< 1$  hours/week), education (junior high school, high school, or college/university or higher). We did not adjust for hypertension and diabetes mellitus in the multivariate models because these variables are considered to occupy an intermediate position in the etiologic pathway between BMI and mortality.

We separately calculated medical expenditure for participants who survived through the index year and for those who died because previous study showed that medical expenditure increased before death.<sup>20</sup> The multiadjusted medical expenditure per year was estimated using a linear regression model adjusted for the above covariates in

1  
2  
3  
4  
5  
6 survivors and decedents.

7  
8  
9 The estimates of multiadjusted mortality and medical expenditure were used for  
10  
11 estimating life expectancy and lifetime medical expenditure from 40 years of age. To  
12  
13 estimate life expectancy and lifetime medical expenditure, we constructed life tables  
14  
15 per100,000 persons using Chiang's analytical method on the basis of the latest published  
16  
17 complete life tables of Japan for the year 2000.<sup>21 22</sup> Then, life expectancy ( $e_x$ ) and  
18  
19 lifetime medical expenditure ( $M_x$ ) for each age-groups (x) were estimated using the  
20  
21 numbers of survivors ( $l_x$ ), deaths ( $d_x$ ), static population ( $L_x$ ), multiadjusted medical  
22  
23 expenditure for survivors ( $a_y$ ), and multiadjusted medical expenditure for the deceased  
24  
25 ( $b_y$ ) as follows;

26  
27  
28  $\Sigma$  is sum of  $y \geq x$

29  
30  
31  
32  
33  
34  
35 
$$e_x = \frac{\Sigma L_y}{l_x}$$

36  
37  
38 
$$M_x = \frac{\Sigma(L_y \cdot a_y + d_y \cdot b_y)}{l_x}$$

39  
40 The 95% confidence intervals (CIs) were estimated using a Monte Carlo simulation  
41  
42 based on a Poisson regression model and linear regression model. We repeated  
43  
44 100,000 times and all analysis were used the SAS version 9.1 statistical software  
45  
46 package (SAS Institute Inc., 2004). All  $p$  values were differences at  $p < .05$  were  
47  
48 accepted as statistically significant.

49  
50  
51  
52 We used a purchasing power parity rate of UK£ 1.00=JPN¥ 140.<sup>16</sup>

## Results

After 13 years of follow-up, we observed 5,159 deaths (3,356 men and 1,803 women) among the 41,965 participants (20,066 men and 21,899 women).

The mean medical expenditure per year for survivors in men was £2,393 in underweight, £2,055 in normal weight, £2,231 in overweight, and £2,334 in obesity, respectively. In women, it was £2,375 in underweight, £1,972 in normal weight, £2,317 in overweight, and £2,733 in obesity, respectively. These differences of mean medical expenditure per year for survivors are statistically significant in men and women (ANOVA;  $p < 0.0001$ ). Also, the mean medical expenditure in the year of death for participants in men was £15,445 in underweight, £16,973 in normal weight, £17,811 in overweight, and £17,878 in obesity, respectively. In women, it was £12,833 in underweight, £15,584 in normal weight, £17,059 in overweight, and £19,635 in obesity, respectively. These differences of mean medical expenditure in the year of death for participants are statistically significant in only women (men;  $p = 0.2241$ , women;  $p = 0.0059$ ).

### Baseline characteristics by BMI category

The baseline characteristics of the study participants according to the BMI categories are shown for men and women (Table 1), among whom 3.3% and 3.9% were

1  
2  
3  
4  
5  
6 underweight, 23.6% and 28.4% were overweight, and 2.0% and 3.6% were obese,  
7  
8 respectively.  
9

10  
11 Mean age in men decreased linearly with increasing BMI category. In women,  
12  
13 mean age was highest in the underweight category. The proportions of men and  
14  
15 women who were current and past smokers decreased with increasing BMI, and this  
16  
17 tendency was especially marked in men. The proportions of men who had never and  
18  
19 past drinker were highest in the underweight category. The proportions of men who  
20  
21 did  $\geq 3$  hours sports and physical exercise per week decreased with increasing BMI.  
22  
23 The proportions of men and women who walked  $\geq 1$  hours per day were the lowest in  
24  
25 underweight men and obese women. Educational background increased linearly in  
26  
27 men and decreased linearly in women as the BMI category increased. These  
28  
29 characteristics showed statistically significant difference.  
30  
31  
32  
33  
34  
35  
36  
37  
38  
39

#### 40 **Mortality in terms of categories for BMI**

41  
42 Figure 1-a for men and Figure 1-b for women show the mortality (per 1,000  
43  
44 person-years) in each of the age-groups according to the categories of BMI.  
45  
46  
47

48 In underweight participants, there was a tendency that the mortality was the highest  
49  
50 in each age-group. Overweight participants showed similar mortality with normal  
51  
52 weight participants, especially women. Overweight men showed slightly lower  
53  
54 mortality than normal weight men. In obese participants, the mortality curve was not  
55  
56  
57  
58  
59  
60



described smoothly because of small number of participants.

Table 2 shows the mortality ratio with 95% CIs according to the categories of BMI. In underweight participants, the multiadjusted mortality ratio was significantly higher than that in normal weight participants (men; 1.62, 95% CIs; 1.41-1.86,  $p<0.0001$ , women; 1.46, 1.22-1.76,  $p<0.0001$ ). In overweight participants, the multiadjusted mortality ratio was significantly lower in men and non-significantly lower in women than that in normal weight participants (men; 0.91, 0.83-0.99,  $p=0.0260$ , women; 0.98, 0.88-1.10,  $p=0.7841$ ). In obese participants, the multiadjusted mortality ratio was non-significantly higher than that in normal weight participants (men; 1.14, 0.88-1.49,  $p=0.3177$ , women; 1.23, 0.98-1.55,  $p=0.0717$ ).

### **Life expectancy and lifetime medical expenditure by BMI category**

Table 3 show life expectancy and lifetime medical expenditure with 95% CIs according to the BMI categories.

By multiadjusted analysis, obese men and women had approximately 1.7 years and 3.1 years non-significantly shorter life expectancy from the age of 40 years in comparison with men and women of normal weight, respectively (men;  $p=0.3184$ , women;  $p=0.0724$ ). Meanwhile, obese men and women had approximately 14.7% non-significantly higher and 21.6% significantly higher lifetime medical expenditure in comparison with normal weight participants, respectively (men;  $p=0.1141$ , women;

1  
2  
3  
4  
5  
6  $p=0.0005$ ).

7  
8  
9 In men, multiadjusted life expectancy was greatest for overweight, i.e. 44.34 years  
10 (95% CI; 43.11-45.54,  $p=0.0264$ ), followed by normal weight (43.03 years,  
11 42.22-43.73), and obesity (41.36 years, 38.28-44.70,  $p=0.3184$ ), and was shortest for  
12 underweight (37.40 years, 35.80-38.87,  $p<.0001$ ). The multiadjusted lifetime medical  
13 expenditure for overweight was the highest, i.e. £114,766.9 (95% CI;  
14 107,754.1-121,966.6,  $p<.0001$ ), followed by obesity (£112,858.9, 94,954.1-131,840.9,  
15  $p=0.1141$ ) and normal weight (£98,355.0, 93,615.3-103,010.2), and was the lowest for  
16 underweight (£93,208.7, 81,704.9-104,706.4,  $p=0.3916$ ).

17  
18  
19 In women, multiadjusted life expectancy was greatest for overweight, i.e. 52.56  
20 years (50.67-54.46,  $p=0.7797$ ), followed by normal weight (52.31 years, 50.79-53.75),  
21 and obesity (49.23 years, 46.14-52.59,  $p=0.0724$ ), and was shortest for underweight  
22 (46.98 years, 44.63-49.29,  $p<.0001$ ). The lifetime medical expenditure for obesity was  
23 the highest (£137,765.9, 123,672.9-152,970.2,  $p=0.0005$ ), followed by overweight  
24 (£129,964.6, 121,845.4-138,577.2,  $p<.0001$ ), and normal weight (£113,282.9,  
25 106,668.0-120,054.6), and was lowest for underweight (£109,382.2, 97,996.6-121,008.6,  
26  $p=0.5174$ ).

## Discussion

The present results indicate that: 1) obese men and women have 14.7% non-significantly higher and 21.6% significantly higher multiadjusted lifetime medical expenditure than those of normal weight (men;  $p=0.1141$ , women;  $p=0.0005$ ), even though their life expectancy is non-significantly shorter by 1.7 years and 3.1 years than those of normal weight participants, respectively (men;  $p=0.3184$ , women;  $p=0.0724$ ); 2) underweight men and women have 5.2% and 3.4% non-significantly lower lifetime medical expenditure than those of normal weight (men;  $p=0.5174$ , women;  $p=0.3916$ ) because men and women live 5.6 years and 5.3 years significantly less than those of normal weight, respectively (men;  $p<.0001$ , women;  $p<.0001$ ).

## Comparison with other studies

Obese participants had shorter life expectancy than normal weight participants, as has been observed in previous studies.<sup>6-10</sup> Overweight participants had longer life expectancy than normal weight participants. Two of four previous studies have reported that overweight participants had longer life expectancy than normal weight participants.<sup>7,9</sup> These results support our finding of an association between being overweight and life expectancy. Additionally, an association between BMI and all-cause mortality in the Japanese population has been reported by other data sets.<sup>23-29</sup>

1  
2  
3  
4  
5  
6 All seven previous studies showed that among the BMI categories, the lowest one had  
7  
8 the highest mortality risk. These results are consistent with the fact that underweight  
9  
10 participants have significantly the shortest life expectancy, as was observed in our study.  
11  
12 Thus the association between BMI and life expectancy showed same trend with the  
13  
14 pooled analyses of the association between BMI and all-cause mortality in Asia and  
15  
16 Japan.<sup>30 31</sup>  
17  
18  
19  
20

21  
22 Our present results support three of four previous studies of lifetime medical  
23  
24 expenditure for obese participants.<sup>10 12 13</sup> In comparison to previous studies, we  
25  
26 calculated lifetime medical expenditure from individual medical expenditure and  
27  
28 survival data covering longest follow-up period to date. Meanwhile, one study has  
29  
30 shown that obese participants have lower lifetime medical expenditure than normal  
31  
32 weight participants.<sup>11</sup> However, that study limited the participants to non-smokers,  
33  
34 and calculated lifetime medical expenditure from the mortality of a hypothetical cohort  
35  
36 and estimated medical expenditure from other cohort. In the present study, overweight  
37  
38 participants were found to have higher lifetime medical expenditure than normal weight  
39  
40 participants, as had been reported previously.<sup>10 12 13</sup> We consider that this was  
41  
42 attributable to the higher medical expenditure per month or per person from the 10-year  
43  
44 or 9-year follow-up than for normal weight participants.<sup>1 3 4</sup> On the other hand, with  
45  
46 regard to underweight participants, our present findings were inconsistent with those of  
47  
48 a previous study that examined the association between being underweight and lifetime  
49  
50  
51  
52  
53  
54  
55  
56  
57  
58  
59  
60

1  
2  
3  
4  
5  
6 medical expenditure.<sup>13</sup> However, that study calculated lifetime medical expenditure  
7  
8 for elderly participants aged over 70 years. Elderly underweight participants have high  
9  
10 mortality,<sup>32</sup> and medical expenditure increases in the 1 year prior to death.<sup>20</sup> Thus,  
11  
12 lifetime medical expenditure from 70 years for underweight participants becomes higher  
13  
14 than for participants of normal weight. Our study results are thus inconsistent with  
15  
16 those reported previously.  
17  
18  
19  
20

21  
22 We previously calculated life expectancy and lifetime medical expenditure for  
23  
24 smokers and non-smokers from age 40 years by using the same dataset as that for the  
25  
26 present study.<sup>17</sup> The results indicated that lifetime medical expenditure was  
27  
28 non-significantly lower in smokers than in non-smokers, reflecting the 3.5 years shorter  
29  
30 life expectancy of smokers. On the other hand, the present study indicated that  
31  
32 lifetime medical expenditure was higher for obese participants in spite of their shorter  
33  
34 life expectancy. This difference would result from the difference in which obesity and  
35  
36 smoking affect one's health and longevity. Previous studies of healthy and disability  
37  
38 free life expectancy have agreed that smoking shortens life expectancy without affecting  
39  
40 the years of life spent with ill-health or disability, while obesity shortens life expectancy  
41  
42 and extends the years of life with ill-health or disability.<sup>33</sup> On the basis of these  
43  
44 differences, Reuser et al. summarized the situation as "smoking kills, and obesity  
45  
46 disables".<sup>7</sup> Extended years with ill-health and/or disability must result in increased  
47  
48 lifetime medical expenditure. All of these findings suggest that weight control would  
49  
50  
51  
52  
53  
54  
55  
56  
57  
58  
59  
60

bring about not only longer life expectancy but also long-term enhancement of the quality of life and a cost saving.

### Strengths and limitations

A major strength of our present study is that it is the first in the world to have clarified the association between BMI and lifetime medical expenditure calculated from individual medical expenditure and mortality data over a long period in a general population from the age of 40 years.<sup>1 14 16-18</sup> The NHI covers almost all medical-care utilization.<sup>1 4 14 16 18</sup> Additionally, in order to reduce bias, we adjusted confounders by including various covariates in our Poisson regression model and linear regression mode.

<sup>16</sup> On the other hand, several limitations of our study should also be considered.

First, we used self-reported BMI which is a source of error.<sup>34 35</sup> We consider this error to be a nondifferential misclassification. This misclassification would lead to attenuation of the true association toward the null. To address this problem, van Dam et al. studied the association between BMI and mortality using lower BMI cutoff points: 24.5 kg/m<sup>2</sup> to reflect a measured BMI of 25.0 kg/m<sup>2</sup>, and 29.0 kg/m<sup>2</sup> to reflect a measured BMI of 30.0 kg/m<sup>2</sup>.<sup>36</sup> The association showed similar with original cutoff points. Second, the 95% CI was wide, and there was a limit to the accurate estimation of life expectancy and lifetime medical expenditure for obese participants.

Additionally, we did not observe significant association in obese participants without

1  
2  
3  
4  
5  
6 lifetime medical expenditure in women. However, our results are consistent with  
7  
8 those of previous studies.<sup>6-8 10 12 13</sup> In Japan, prevalence of obesity is only 3%.<sup>37</sup>  
9

10  
11 Thus the reason of non-significant association might be beta error because of lack of  
12  
13 statistical power due to small number of obese participants.  
14  
15

### 16 17 18 19 **Conclusions and policy implication**

20  
21 In summary, even though we observed non-significant association between obesity, life  
22  
23 expectancy, and lifetime medical expenditure without lifetime medical expenditure in  
24  
25 women, lifetime medical expenditure might appear to be higher for obese participants,  
26  
27 despite their short life expectancy. With better weight control, more people would  
28  
29 enjoy their longevity with lower needs and demands for medical care.  
30  
31  
32  
33  
34  
35  
36  
37  
38  
39  
40  
41  
42  
43  
44  
45  
46  
47  
48  
49  
50  
51  
52  
53  
54  
55  
56  
57  
58  
59  
60

### Article focus

- Obese people have higher needs and demands for medical care.
- Obesity is associated with an increased risk of mortality.
- In view of the decreased life expectancy in obese participants, it is unclear whether lifetime medical expenditure increases or decreases as a result.

### Key messages

- In spite of their short life expectancy, obese men and women had approximately 14.7% and 21.6% higher lifetime medical expenditure in comparison with normal weight participants, respectively.
- With better weight control, more people would enjoy their longevity with lower needs and demands for medical care.

### Strengths and limitations of this study

- This is the first study to have investigated the association between BMI, life expectancy, and lifetime medical expenditure calculated from individual medical expenditure and mortality data over a long period in a general population.
- There was a limit to the accurate estimation of life expectancy and lifetime medical expenditure for obese participants because the Japanese population has a low prevalence of BMI $\geq$ 30.0 kg/m<sup>2</sup>.



## Contributions

All authors contributed to the design of the study. Masato Nagai, Shinichi Kuriyama, Masako Kakizaki, Kaori Ohmori-Matsuda, Toshimasa Sone, and Ichiro Tsuji participated in data collection. Masato Nagai, Shinichi Kuriyama, Atsushi Hozawa, Miyuki Kawado, and Shuji Hashimoto participated in data analysis. Masato Nagai, Masako Kakizaki, Kaori Ohmori-Matsuda, Toshimasa Sone, Atsushi Hozawa, Miyuki Kawado, and Shuji Hashimoto participated in the writing of the report. Shinichi Kuriyama and Ichiro Tsuji participated in critical revision of the manuscript. All authors approved the final version of the report for submission.

## Funding

This study was supported by a Health Sciences Research Grant for Health Services (H21-Choju-Ippan-001, H20-Junkankitou (Seisyu)-Ippan-013, H22- Junkankitou (Seisyu)-Ippan-012), Ministry of Health, Labour and Welfare, Japan. Masato Nagai is a recipient of a Research Fellowships of the Japan Society for the Promotion of Science for Young Scientists.

## Conflicts of Interest

The authors declare that they have no conflicts of interest.

**Ethical approval**

The study protocol was approved by the Ethics Committee of Tohoku University

School of Medicine. Participants who had returned the self-administered

questionnaires and signed them were considered to have consented to participate.

**Data sharing**

No additional data available.

**Figure legend**

Figure 1

Multiadjusted mortality by BMI categories in each age-group in men (a) and women  
(b).

**References**

1. Kuriyama S, Tsuji I, Ohkubo T, et al. Medical care expenditure associated with body mass index in Japan: the Ohsaki Study. *Int J Obes Relat Metab Disord* 2002; 26: 1069-74.
2. Detournay B, Fagnani F, Phillippo M, et al. Obesity morbidity and health care costs in France: an analysis of the 1991-1992 Medical Care Household Survey. *Int J Obes Relat Metab Disord* 2000; 24: 151-5.
3. Thompson D, Brown JB, Nichols GA, et al. Body mass index and future healthcare costs: a retrospective cohort study. *Obes Res* 2001; 9: 210-8.
4. Nakamura K, Okamura T, Kanda H, et al. Medical costs of obese Japanese: a 10-year follow-up study of National Health Insurance in Shiga, Japan. *Eur J Public Health* 2007; 17: 424-9.
5. Quesenberry CP, Jr., Caan B, Jacobson A. Obesity, health services use, and health care costs among members of a health maintenance organization. *Arch Intern Med* 1998; 158: 466-72.
6. Peeters A, Barendregt JJ, Willekens F, et al. Obesity in adulthood and its consequences for life expectancy: a life-table analysis. *Ann Intern Med* 2003; 138: 24-32.
7. Reuser M, Bonneux LG, Willekens FJ. Smoking kills, obesity disables: a multistate approach of the US Health and Retirement Survey. *Obesity (Silver Spring)* 2009;

- 1  
2  
3  
4  
5  
6 17: 783-9.  
7  
8  
9 8. van Baal PH, Hoogenveen RT, de Wit GA, et al. Estimating health-adjusted life  
10  
11 expectancy conditional on risk factors: results for smoking and obesity. *Popul*  
12  
13 *Health Metr* 2006; 4: 14.  
14  
15  
16 9. Reuser M, Bonneux L, Willekens F. The burden of mortality of obesity at middle and  
17  
18 old age is small. A life table analysis of the US Health and Retirement Survey.  
19  
20 *Eur J Epidemiol* 2008; 23: 601-7.  
21  
22  
23  
24 10. Thompson D, Edelsberg J, Colditz GA, et al. Lifetime health and economic  
25  
26 consequences of obesity. *Arch Intern Med* 1999; 159: 2177-83.  
27  
28  
29  
30 11. van Baal PH, Polder JJ, de Wit GA, et al. Lifetime medical costs of obesity:  
31  
32 prevention no cure for increasing health expenditure. *PLoS Med* 2008; 5: e29.  
33  
34  
35 12. Finkelstein EA, Trogdon JG, Brown DS, et al. The lifetime medical cost burden of  
36  
37 overweight and obesity: implications for obesity prevention. *Obesity (Silver*  
38  
39 *Spring)* 2008; 16: 1843-8.  
40  
41  
42  
43 13. Lakdawalla DN, Goldman DP, Shang B. The health and cost consequences of  
44  
45 obesity among the future elderly. *Health Aff (Millwood)* 2005; 24: W5R30-41.  
46  
47  
48  
49 14. Tsuji I, Nishino Y, Ohkubo T, et al. A prospective cohort study on National Health  
50  
51 Insurance beneficiaries in Ohsaki, Miyagi Prefecture, Japan: study design,  
52  
53 profiles of the subjects and medical cost during the first year. *J Epidemiol* 1998;  
54  
55  
56 8: 258-63.  
57  
58  
59  
60

- 1  
2  
3  
4  
5  
6 15. Kuriyama S, Shimazu T, Ohmori K, et al. Green tea consumption and mortality due  
7  
8 to cardiovascular disease, cancer, and all causes in Japan: the Ohsaki study.  
9  
10 to cardiovascular disease, cancer, and all causes in Japan: the Ohsaki study.  
11  
12 *JAMA* 2006; 296: 1255-65.  
13  
14 16. Nagai M, Kuriyama S, Kakizaki M, et al. Impact of walking on life expectancy and  
15  
16 lifetime medical expenditure: the Ohsaki Cohort Study. *BMJ Open* 2011; 1:  
17  
18 bmjopen2011000240.  
19  
20  
21 17. Hayashida K, Imanaka Y, Murakami G, et al. Difference in lifetime medical  
22  
23 expenditures between male smokers and non-smokers. *Health Policy* 2010; 94:  
24  
25 84-9.  
26  
27  
28  
29 18. Tsuji I, Takahashi K, Nishino Y, et al. Impact of walking upon medical care  
30  
31 expenditure in Japan: the Ohsaki Cohort Study. *Int J Epidemiol* 2003; 32:  
32  
33 809-14.  
34  
35  
36  
37 19. World Health Organization. The use and interpretation of anthropometry: report of a  
38  
39 WHO expert committee. *WHO Tech Rep Ser* 1995; 854: 312-409.  
40  
41  
42 20. Breyer F, Felder S. Life expectancy and health care expenditures: a new calculation  
43  
44 for Germany using the costs of dying. *Health Policy* 2006; 75: 178-86.  
45  
46  
47  
48 21. Chiang CL. *The Life Table and Its Applications*: Krieger Publishing Company, 1983.  
49  
50  
51 22. Statistics and Information Department Minister's Secretariat, Ministry of Health,  
52  
53 Labour and Welfare of Japan. *The 20th Life Tables*. Tokyo: Health and Welfare  
54  
55 Statistics Association, Japan, 2000.  
56  
57  
58  
59  
60

- 1  
2  
3  
4  
5  
6 23. Hayashi R, Iwasaki M, Otani T, et al. Body mass index and mortality in a  
7  
8 middle-aged Japanese cohort. *J Epidemiol* 2005; 15: 70-7.  
9  
10  
11 24. Hozawa A, Okamura T, Oki I, et al. Relationship between BMI and all-cause  
12  
13 mortality in Japan: NIPPON DATA80. *Obesity (Silver Spring)* 2008; 16: 1714-7.  
14  
15  
16 25. Kuriyama S, Ohmori K, Miura C, et al. Body mass index and mortality in Japan: the  
17  
18 Miyagi Cohort Study. *J Epidemiol* 2004; 14: S33-8.  
19  
20  
21 26. Matsuo T, Sairenchi T, Iso H, et al. Age- and gender-specific BMI in terms of the  
22  
23 lowest mortality in Japanese general population. *Obesity (Silver Spring)* 2008;  
24  
25 16: 2348-55.  
26  
27  
28 27. Miyazaki M, Babazono A, Ishii T, et al. Effects of low body mass index and  
29  
30 smoking on all-cause mortality among middle-aged and elderly Japanese. *J*  
31  
32 *Epidemiol* 2002; 12: 40-4.  
33  
34  
35 28. Tamakoshi A, Yatsuya H, Lin Y, et al. BMI and all-cause mortality among Japanese  
36  
37 older adults: findings from the Japan collaborative cohort study. *Obesity (Silver*  
38  
39 *Spring)* 2010; 18: 362-9.  
40  
41  
42 29. Tsugane S, Sasaki S, Tsubono Y. Under- and overweight impact on mortality among  
43  
44 middle-aged Japanese men and women: a 10-y follow-up of JPHC study cohort I.  
45  
46 *Int J Obes Relat Metab Disord* 2002; 26: 529-37.  
47  
48  
49  
50  
51 30. Zheng W, McLerran DF, Rolland B, et al. Association between body-mass index and  
52  
53 risk of death in more than 1 million Asians. *N Engl J Med* 2011; 364: 719-29.  
54  
55  
56  
57  
58  
59  
60

- 1  
2  
3  
4  
5  
6 31. Sasazuki S, Inoue M, Tsuji I, et al. Body mass index and mortality from all causes  
7  
8 and major causes in Japanese: results of a pooled analysis of 7 large-scale cohort  
9  
10 studies. *J Epidemiol* 2011; 21: 417-30.  
11  
12  
13  
14 32. Grabowski DC, Ellis JE. High body mass index does not predict mortality in older  
15  
16 people: analysis of the Longitudinal Study of Aging. *J Am Geriatr Soc* 2001; 49:  
17  
18 968-79.  
19  
20  
21  
22 33. LaCroix AZ, Guralnik JM, Berkman LF, et al.. Maintaining mobility in late life. II.  
23  
24 Smoking, alcohol consumption, physical activity, and body mass index. *Am J*  
25  
26 *Epidemiol* 1993; 137: 858-69.  
27  
28  
29  
30 34. Niedhammer I, Bugel I, Bonenfant S, et al. Validity of self-reported weight and  
31  
32 height in the French GAZEL cohort. *Int J Obes Relat Metab Disord* 2000; 24:  
33  
34 1111-8.  
35  
36  
37  
38 35. Gillum RF, Sempos CT. Ethnic variation in validity of classification of overweight  
39  
40 and obesity using self-reported weight and height in American women and men:  
41  
42 the Third National Health and Nutrition Examination Survey. *Nutr J* 2005; 4: 27.  
43  
44  
45  
46 36. van Dam RM, Willett WC, Manson JE, et al. The relationship between overweight  
47  
48 in adolescence and premature death in women. *Ann Intern Med* 2006; 145: 91-7.  
49  
50  
51 37. Yoshiike N, Matsumura Y, Zaman MM, et al. Descriptive epidemiology of body  
52  
53 mass index in Japanese adults in a representative sample from the National  
54  
55 Nutrition Survey 1990-1994. *Int J Obes Relat Metab Disord* 1998; 22: 684-7.  
56  
57  
58  
59  
60

Table 1 Baseline characteristics by BMI<sup>a</sup> categories in 41,965 participants.

|                                  | Men                      |           |           |       |        | <i>p</i> value <sup>b</sup> | Women                    |           |           |        | <i>p</i> value |
|----------------------------------|--------------------------|-----------|-----------|-------|--------|-----------------------------|--------------------------|-----------|-----------|--------|----------------|
|                                  | BMI (kg/m <sup>2</sup> ) |           |           |       |        |                             | BMI (kg/m <sup>2</sup> ) |           |           |        |                |
|                                  | <18.5                    | 18.5-24.9 | 25.0-29.9 | ≥30.0 |        |                             | <18.5                    | 18.5-24.9 | 25.0-29.9 | ≥30.0  |                |
| No. of subjects                  | 666                      | 14,278    | 4,730     | 392   |        | 857                         | 14,031                   | 6,226     | 785       |        |                |
| Mean age (years)                 | 64.0                     | 59.1      | 57.4      | 56.1  | <.0001 | 63.7                        | 59.8                     | 60.7      | 61.2      | <.0001 |                |
| SD <sup>a</sup>                  | 10.4                     | 10.5      | 10.2      | 10.2  |        | 10.9                        | 10.1                     | 9.1       | 9.5       |        |                |
| Smoking status (%)               |                          |           |           |       |        |                             |                          |           |           |        |                |
| Current and Past smoker          | 87.3                     | 82.5      | 76.6      | 74.8  | <.0001 | 18.6                        | 11.2                     | 10.1      | 10.6      | <.0001 |                |
| Never smoker                     | 12.7                     | 17.5      | 23.4      | 25.2  |        | 81.4                        | 88.8                     | 90.0      | 89.4      |        |                |
| Alcohol consumption (%)          |                          |           |           |       |        |                             |                          |           |           |        |                |
| Current drinker, 1-449 g/week    | 49.2                     | 61.0      | 61.4      | 50.8  | <.0001 | 18.2                        | 21.8                     | 21.4      | 19.3      | 0.0574 |                |
| Current drinker, ≥450 g/week     | 9.6                      | 11.7      | 12.6      | 15.0  |        | 0.6                         | 0.8                      | 0.5       | 0.9       |        |                |
| Never and past drinker           | 41.2                     | 27.3      | 26.0      | 34.2  |        | 81.2                        | 77.4                     | 78.2      | 79.8      |        |                |
| Sports and physical exercise (%) |                          |           |           |       |        |                             |                          |           |           |        |                |
| ≥3 hours/week                    | 17.5                     | 16.1      | 13.8      | 10.1  | <.0001 | 9.8                         | 11.3                     | 11.0      | 10.8      | 0.5993 |                |
| <3 hour/week                     | 82.5                     | 83.9      | 86.2      | 89.9  |        | 90.2                        | 88.7                     | 89.0      | 89.2      |        |                |
| Time spent walking (%)           |                          |           |           |       |        |                             |                          |           |           |        |                |
| ≥1 hour/day                      | 41.7                     | 51.4      | 45.8      | 42.7  | <.0001 | 37.9                        | 45.1                     | 41.0      | 35.6      | <.0001 |                |
| <1 hour/day                      | 58.3                     | 48.7      | 54.2      | 57.3  |        | 62.1                        | 54.9                     | 59.0      | 64.4      |        |                |
| Education (%)                    |                          |           |           |       |        |                             |                          |           |           |        |                |
| Junior high school               | 64.2                     | 62.2      | 58.9      | 58.8  | 0.0013 | 58.3                        | 54.2                     | 62.7      | 71.3      | <.0001 |                |
| High school                      | 27.4                     | 30.5      | 33.4      | 33.4  |        | 34.0                        | 36.9                     | 31.0      | 24.6      |        |                |
| College/university or higher     | 8.4                      | 7.3       | 7.7       | 7.8   |        | 7.7                         | 8.9                      | 6.3       | 4.1       |        |                |

<sup>a</sup> BMI, body mass index; SD, standard deviation.

<sup>b</sup> *p* values were calculated by chi-squared test (categorical variables) or ANOVA (continuous variables).



Table 2. Mortality ratio for BMI<sup>a</sup> categories in 41,965 participants.

|       | BMI (kg/m <sup>2</sup> ) | Univariate      |                         |                | Multiadjusted <sup>b</sup> |                         |                |
|-------|--------------------------|-----------------|-------------------------|----------------|----------------------------|-------------------------|----------------|
|       |                          | Mortality ratio | 95% confidence interval | <i>p</i> value | Mortality ratio            | 95% confidence interval | <i>p</i> value |
| Men   | <18.5                    | 1.69            | 1.47 - 1.93             | <.0001         | 1.62                       | 1.41 - 1.86             | <.0001         |
|       | 18.5-24.9                | 1.00            | Reference               |                | 1.00                       | Reference               |                |
|       | 25.0-29.9                | 0.90            | 0.82 - 0.98             | 0.0163         | 0.91                       | 0.83 - 0.99             | 0.0260         |
|       | ≥30.0                    | 1.13            | 0.87 - 1.47             | 0.3712         | 1.14                       | 0.88 - 1.49             | 0.3177         |
| Women | <18.5                    | 1.50            | 1.25 - 1.81             | <.0001         | 1.46                       | 1.22 - 1.76             | <.0001         |
|       | 18.5-24.9                | 1.00            | Reference               |                | 1.00                       | Reference               |                |
|       | 25.0-29.9                | 1.00            | 0.89 - 1.11             | 0.9613         | 0.98                       | 0.88 - 1.10             | 0.7841         |
|       | ≥30.0                    | 1.29            | 1.03 - 1.62             | 0.0273         | 1.23                       | 0.98 - 1.55             | 0.0717         |

<sup>a</sup> BMI, body mass index.<sup>b</sup> Adjusted for age groups, smoking status, alcohol drinking, sports and physical exercise, time spent walking, and education.

Table 3. Life expectancy and lifetime medical expenditure at age 40 years for BMI<sup>a</sup> categories in 41,965 participants.

| BMI (kg/m <sup>2</sup> ) | Univariate                                       |                       |                | Multiadjusted <sup>b</sup> |                       |                |
|--------------------------|--------------------------------------------------|-----------------------|----------------|----------------------------|-----------------------|----------------|
|                          | Estimate                                         | 95% confidence        | <i>p</i> value | Estimate                   | 95% confidence        | <i>p</i> value |
| Men                      | Life expectancy at age 40 years (years)          |                       |                |                            |                       |                |
| <18.5                    | 36.72                                            | 35.10 - 38.17         | <.0001         | 37.40                      | 35.80 - 38.87         | <.0001         |
| 18.5-24.9                | 42.70                                            | 41.91 - 43.37         | Reference      | 43.03                      | 42.22 - 43.73         | Reference      |
| 25.0-29.9                | 44.09                                            | 42.89 - 45.25         | 0.0157         | 44.34                      | 43.11 - 45.54         | 0.0264         |
| ≥30.0                    | 41.23                                            | 38.16 - 44.54         | 0.3733         | 41.36                      | 38.28 - 44.70         | 0.3184         |
|                          | Lifetime medical expenditure at age 40 years (£) |                       |                |                            |                       |                |
| <18.5                    | 94,877.5                                         | 83,411.4 - 106,275.7  | 0.6846         | 93,208.7                   | 81,704.9 - 104,706.4  | 0.3916         |
| 18.5-24.9                | 97,244.1                                         | 92,662.5 - 101,774.0  | Reference      | 98,355.0                   | 93,615.3 - 103,010.2  | Reference      |
| 25.0-29.9                | 114,398.2                                        | 107,490.1 - 121,505.3 | <.0001         | 114,766.9                  | 107,754.1 - 121,966.6 | <.0001         |
| ≥30.0                    | 115,362.6                                        | 97,361.8 - 134,555.0  | 0.0501         | 112,858.9                  | 94,954.1 - 131,840.9  | 0.1141         |
| Women                    | Life expectancy at age 40 years (years)          |                       |                |                            |                       |                |
| <18.5                    | 46.26                                            | 43.98 - 48.43         | <.0001         | 46.98                      | 44.63 - 49.29         | <.0001         |
| 18.5-24.9                | 51.70                                            | 50.28 - 53.02         | Reference      | 52.31                      | 50.79 - 53.75         | Reference      |
| 25.0-29.9                | 51.74                                            | 49.98 - 53.48         | 0.9582         | 52.56                      | 50.67 - 54.46         | 0.7797         |
| ≥30.0                    | 48.13                                            | 45.23 - 51.22         | 0.0272         | 49.23                      | 46.14 - 52.59         | 0.0724         |
|                          | Lifetime medical expenditure at age 40 years (£) |                       |                |                            |                       |                |
| <18.5                    | 108,278.3                                        | 97,142.8 - 119,593.7  | 0.5816         | 109,382.2                  | 97,996.6 - 121,008.6  | 0.5174         |
| 18.5-24.9                | 111,512.8                                        | 105,303.4 - 117,910.4 | Reference      | 113,282.9                  | 106,668.0 - 120,054.6 | Reference      |
| 25.0-29.9                | 127,869.3                                        | 120,236.3 - 135,932.3 | <.0001         | 129,964.6                  | 121,845.4 - 138,577.2 | <.0001         |
| ≥30.0                    | 134,887.1                                        | 121,318.4 - 149,383.6 | 0.0007         | 137,765.9                  | 123,672.9 - 152,970.2 | 0.0005         |

<sup>a</sup> BMI, body mass index.

<sup>b</sup> Adjusted for age groups, smoking status, alcohol drinking, sports and physical exercise, time spent walking, and education.

**ANALYSIS**

deemed to be important to include in checklists for each type of study. A provisional list of items prepared in advance (available from our website) was used to facilitate discussions. The three draft checklists were then discussed by all participants and, where possible, items were revised to make them applicable to all three study

designs. In a final plenary session, the group decided on the strategy for finalising and disseminating the STROBE statement.

After the workshop we drafted a combined checklist including all three designs and made it available on our website. We invited participants and additional scientists

STROBE statement—checklist of items that should be included in reports of observational studies

|                           | Item No | Recommendation                                                                                                                                                                                                                                                                                                                                                                                                                                                                                                                                                                                                                                                                                                                                                          |
|---------------------------|---------|-------------------------------------------------------------------------------------------------------------------------------------------------------------------------------------------------------------------------------------------------------------------------------------------------------------------------------------------------------------------------------------------------------------------------------------------------------------------------------------------------------------------------------------------------------------------------------------------------------------------------------------------------------------------------------------------------------------------------------------------------------------------------|
| <b>Title and abstract</b> |         |                                                                                                                                                                                                                                                                                                                                                                                                                                                                                                                                                                                                                                                                                                                                                                         |
|                           | 1       | <ul style="list-style-type: none"> <li>✓ (a) Indicate the study's design with a commonly used term in the title or the abstract</li> <li>✓ (b) Provide in the abstract an informative and balanced summary of what was done and what was found</li> </ul>                                                                                                                                                                                                                                                                                                                                                                                                                                                                                                               |
| <b>Introduction</b>       |         |                                                                                                                                                                                                                                                                                                                                                                                                                                                                                                                                                                                                                                                                                                                                                                         |
| Background/rationale      | 2       | ✓ Explain the scientific background and rationale for the investigation being reported                                                                                                                                                                                                                                                                                                                                                                                                                                                                                                                                                                                                                                                                                  |
| Objectives                | 3       | ✓ State specific objectives, including any prespecified hypotheses                                                                                                                                                                                                                                                                                                                                                                                                                                                                                                                                                                                                                                                                                                      |
| <b>Methods</b>            |         |                                                                                                                                                                                                                                                                                                                                                                                                                                                                                                                                                                                                                                                                                                                                                                         |
| Study design              | 4       | ✓ Present key elements of study design early in the paper                                                                                                                                                                                                                                                                                                                                                                                                                                                                                                                                                                                                                                                                                                               |
| Setting                   | 5       | ✓ Describe the setting, locations, and relevant dates, including periods of recruitment, exposure, follow-up, and data collection                                                                                                                                                                                                                                                                                                                                                                                                                                                                                                                                                                                                                                       |
| Participants              | 6       | <ul style="list-style-type: none"> <li>✓ (a) <i>Cohort study</i>—Give the eligibility criteria, and the sources and methods of selection of participants. Describe methods of follow-up</li> <li><i>Case-control study</i>—Give the eligibility criteria, and the sources and methods of case ascertainment and control selection. Give the rationale for the choice of cases and controls</li> <li><i>Cross sectional study</i>—Give the eligibility criteria, and the sources and methods of selection of participants</li> <li>(b) <i>Cohort study</i>—For matched studies, give matching criteria and number of exposed and unexposed</li> <li><i>Case-control study</i>—For matched studies, give matching criteria and the number of controls per case</li> </ul> |
| Variables                 | 7       | ✓ Clearly define all outcomes, exposures, predictors, potential confounders, and effect modifiers. Give diagnostic criteria, if applicable                                                                                                                                                                                                                                                                                                                                                                                                                                                                                                                                                                                                                              |
| Data sources/ measurement | 8*      | ✓ For each variable of interest, give sources of data and details of methods of assessment (measurement). Describe comparability of assessment methods if there is more than one group                                                                                                                                                                                                                                                                                                                                                                                                                                                                                                                                                                                  |
| Bias                      | 9       | ✓ Describe any efforts to address potential sources of bias                                                                                                                                                                                                                                                                                                                                                                                                                                                                                                                                                                                                                                                                                                             |
| Study size                | 10      | ✓ Explain how the study size was arrived at                                                                                                                                                                                                                                                                                                                                                                                                                                                                                                                                                                                                                                                                                                                             |
| Quantitative variables    | 11      | ✓ Explain how quantitative variables were handled in the analyses. If applicable, describe which groupings were chosen and why                                                                                                                                                                                                                                                                                                                                                                                                                                                                                                                                                                                                                                          |
| Statistical methods       | 12      | <ul style="list-style-type: none"> <li>✓ (a) Describe all statistical methods, including those used to control for confounding</li> <li>✓ (b) Describe any methods used to examine subgroups and interactions</li> <li>✓ (c) Explain how missing data were addressed</li> <li>✓ (d) <i>Cohort study</i>—If applicable, explain how loss to follow-up was addressed</li> <li><i>Case-control study</i>—If applicable, explain how matching of cases and controls was addressed</li> <li><i>Cross sectional study</i>—If applicable, describe analytical methods taking account of sampling strategy</li> <li>✓ (e) Describe any sensitivity analyses</li> </ul>                                                                                                          |
| <b>Results</b>            |         |                                                                                                                                                                                                                                                                                                                                                                                                                                                                                                                                                                                                                                                                                                                                                                         |
| Participants              | 13*     | <ul style="list-style-type: none"> <li>✓ (a) Report numbers of individuals at each stage of study—eg numbers potentially eligible, examined for eligibility, confirmed eligible, included in the study, completing follow-up, and analysed</li> <li>✓ (b) Give reasons for non-participation at each stage</li> <li>(c) Consider use of a flow diagram</li> </ul>                                                                                                                                                                                                                                                                                                                                                                                                       |
| Descriptive data          | 14*     | <ul style="list-style-type: none"> <li>✓ (a) Give characteristics of study participants (eg demographic, clinical, social) and information on exposures and potential confounders</li> <li>(b) Indicate number of participants with missing data for each variable of interest</li> <li>✓ (c) <i>Cohort study</i>—Summarise follow-up time (eg average and total amount)</li> </ul>                                                                                                                                                                                                                                                                                                                                                                                     |
| Outcome data              | 15*     | <ul style="list-style-type: none"> <li>✓ <i>Cohort study</i>—Report numbers of outcome events or summary measures over time</li> <li><i>Case-control study</i>—Report numbers in each exposure category, or summary measures of exposure</li> <li><i>Cross sectional study</i>—Report numbers of outcome events or summary measures</li> </ul>                                                                                                                                                                                                                                                                                                                                                                                                                          |
| Main results              | 16      | <ul style="list-style-type: none"> <li>✓ (a) Report the numbers of individuals at each stage of the study—eg numbers potentially eligible, examined for eligibility, confirmed eligible, included in the study, completing follow-up, and analysed</li> <li>✓ (b) Give reasons for non-participation at each stage</li> <li>(c) Consider use of a flow diagram</li> </ul>                                                                                                                                                                                                                                                                                                                                                                                               |
| Other analyses            | 17      | Report other analyses done—eg analyses of subgroups and interactions, and sensitivity analyses                                                                                                                                                                                                                                                                                                                                                                                                                                                                                                                                                                                                                                                                          |
| <b>Discussion</b>         |         |                                                                                                                                                                                                                                                                                                                                                                                                                                                                                                                                                                                                                                                                                                                                                                         |
| Key results               | 18      | ✓ Summarise key results with reference to study objectives                                                                                                                                                                                                                                                                                                                                                                                                                                                                                                                                                                                                                                                                                                              |
| Limitations               | 19      | ✓ Discuss limitations of the study, taking into account sources of potential bias or imprecision. Discuss both direction and magnitude of any potential bias                                                                                                                                                                                                                                                                                                                                                                                                                                                                                                                                                                                                            |
| Interpretation            | 20      | ✓ Give a cautious overall interpretation of results considering objectives, limitations, multiplicity of analyses, results from similar studies, and other relevant evidence                                                                                                                                                                                                                                                                                                                                                                                                                                                                                                                                                                                            |
| Generalisability          | 21      | ✓ Discuss the generalisability (external validity) of the study results                                                                                                                                                                                                                                                                                                                                                                                                                                                                                                                                                                                                                                                                                                 |
| Other information         |         |                                                                                                                                                                                                                                                                                                                                                                                                                                                                                                                                                                                                                                                                                                                                                                         |
| Funding                   | 22      | ✓ Give the source of funding and the role of the funders for the present study and, if applicable, for the original study on which the present article is based                                                                                                                                                                                                                                                                                                                                                                                                                                                                                                                                                                                                         |

\*Give information separately for cases and controls in case-control studies and, if applicable, for exposed and unexposed groups in cohort and cross sectional studies. The STROBE checklist is best used in conjunction with the explanation and elaboration article.<sup>18-20</sup> This article and separate versions of the checklist for cohort, case-control, and cross sectional studies are available at [www.strobe-statement.org](http://www.strobe-statement.org).

Figure 1-a

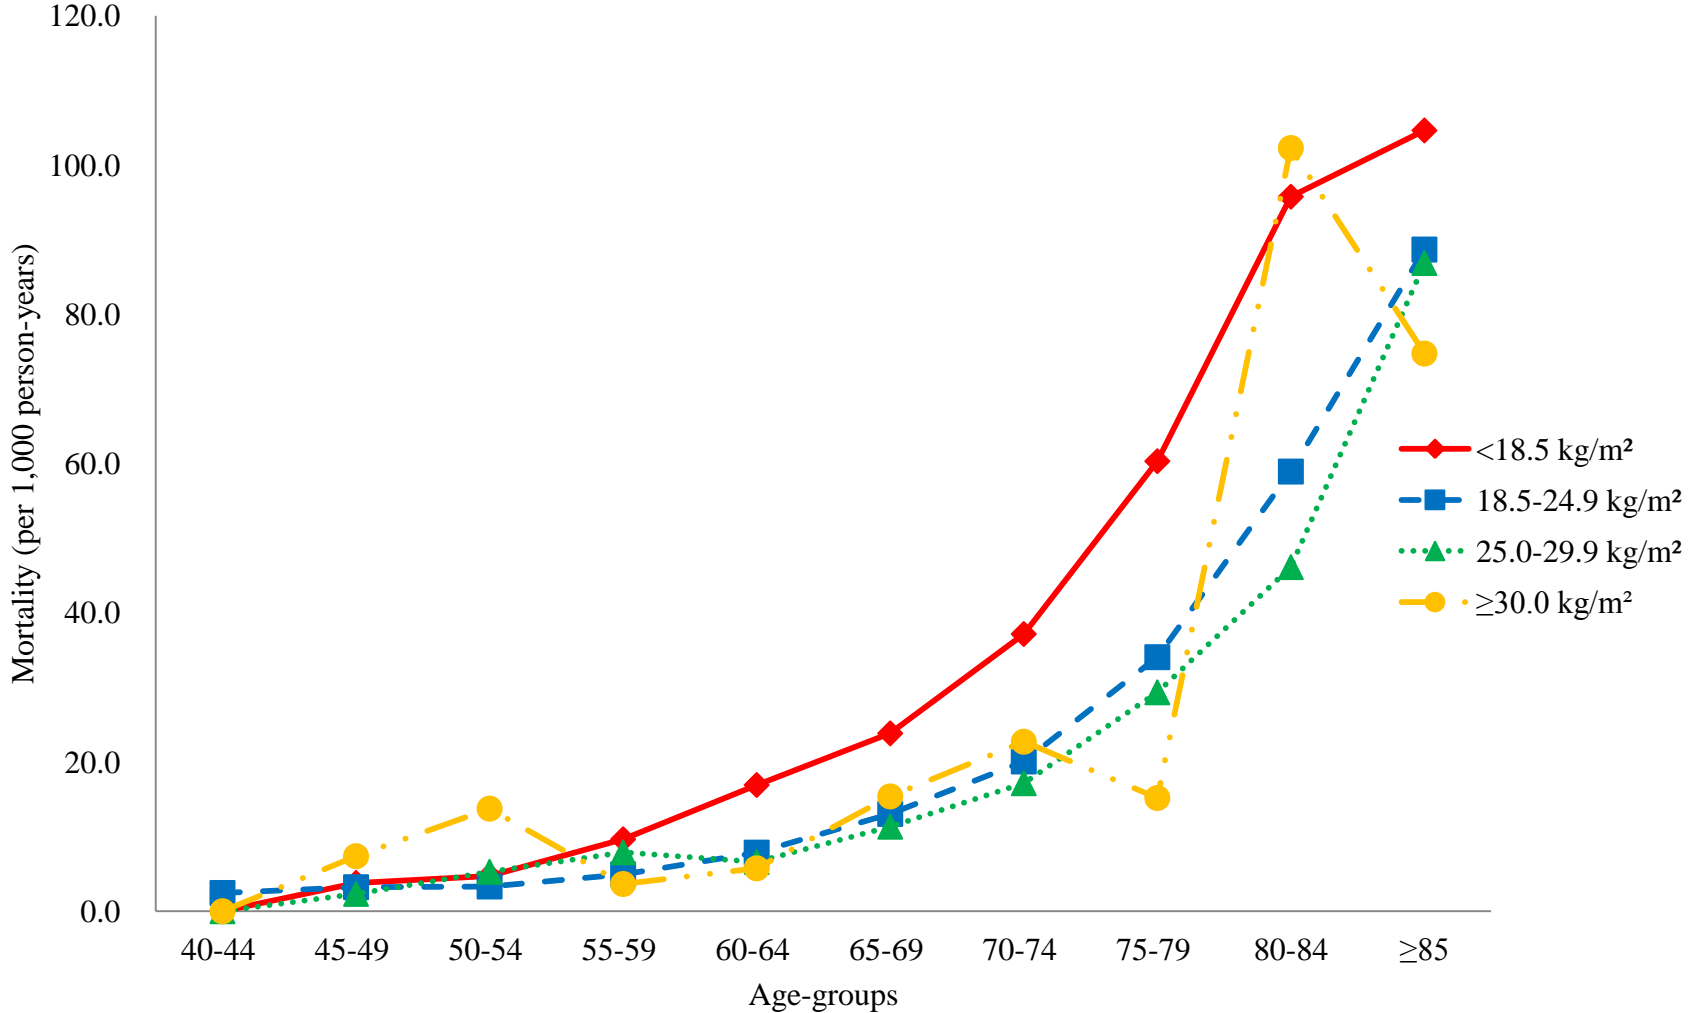

Figure 1-b

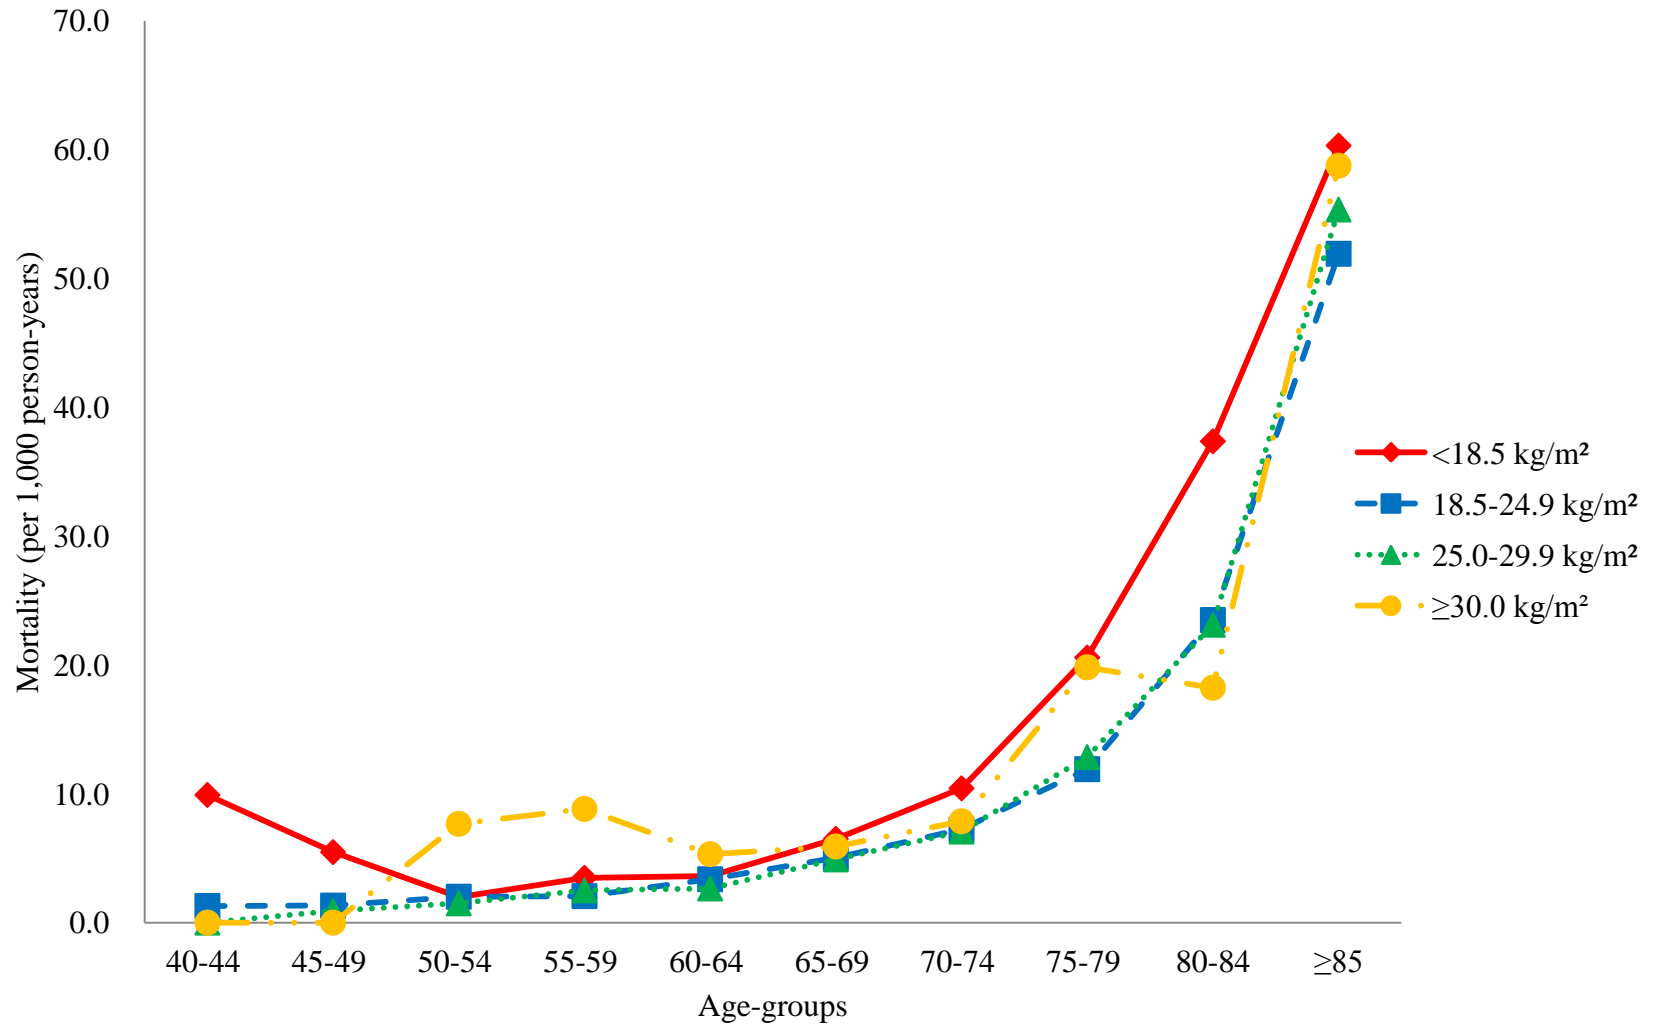

Supplement: bmjopen-2012-000940.draft_revisions.pdf [file bmjopen-2012-000940.draft_revisions.pdf]
